# Heat Shock Alters the distribution and In Vivo Interaction of Major Nuclear Structural Proteins, Lamin and DNA Topoisomerase II, with Nucleic Acids

## Authors

Rowińska Marta\*, Tomczak Aleksandra\*, Jadwiga Jabłońska, Katarzyna Piekarowicz, Magdalena Machowska and Ryszard Rzepecki<sup>&</sup>

*Laboratory of Nuclear Proteins, Faculty of Biotechnology, University of Wrocław, Wrocław, Poland Fryderyk Joliot-Curie Street 14a, 50-383 Wrocław, Poland*  
*[www.nuclearproteins.com](http://www.nuclearproteins.com)*

*& [ryszard.rzepecki@uwr.edu.pl](mailto:ryszard.rzepecki@uwr.edu.pl)*

**Acknowledgement:** Funded by National Centre for Science (NCN) grant Nr 2016/21/B/NZ4/00541

Running title: Lamin-topoisomerase 2-nucleic acid Top2 interactions during heat shock

Key words: karyoskeleton, nucleus, lamin, topoisomerase, heat shock, *Drosophila*, immunoprecipitation

## ABSTRACT

*Drosophila melanogaster* animal model and tissue culture cells have been widely used for studies of nuclear structure and processes as well as for chromatin structure and expression. This system has been used also for studies of the properties of karyoskeletal proteins and the role of chromatin proteins and sequences in chromatin structure maintenance and regulation upon heat shock induction. We previously reported that lamin Dm and topoisomerase II bind *in vivo* both DNA and RNA and the properties of both proteins have been modulated by specific phosphorylation on particular sites. Here we report the results of the part of the project focused on the demonstration of the role of lamins and Top2 in the regulation of gene expression and chromatin organization upon heat shock induction and recovery. We demonstrated that heat shock significantly induced specific phosphorylation of lamin Dm at least on S25. Lam and Top2 were relocated and changed properties including solubility. Both proteins interact with each other directly and indirectly and binding was significantly increased by HS. Relocation of Lam and Top2 was associated with the relocation of chromatin as detected in polyploidy third instar larvae nuclei. *In vivo*, photocrosslinking and IP studies indicated a significant increase in binding to chromatin and nucleic acids upon HS induction. The highest binding affinity showed a soluble fraction of lamin Dm and topoisomerase II while the lowest was the insoluble fraction (nuclear matrix fraction). All the detected changes in properties and location of proteins returned to “normal” after recovery from heat shock. Based on this data and available interactome data for lamin Dm and Top2 as well as RNAse and ChIPseq (manuscript in preparation) we believe that both proteins play essential roles in the proper response of fly cells to HS by participation in chromatin remodelling, rearrangement of protein complexes and proper gene expression regulation.

## INTRODUCTION

Lamins and topoisomerase II (Top2) have been considered among the major components of the karyoskeletal structures since early 80-ties studies when commonly used experimental analyses were based on the isolation of nuclear matrix or chromosomal/nuclear scaffold structures. Importantly, it has been reported (Evan and Hancock, 1985), that heat shock (thermal stress) in mammalian cells dramatically enhanced the protein content and affected the composition of so-called nuclear 'matrix' fractions generated subsequently by cell fractionation *in vitro*. Similar observations were reported for *Drosophila* (Fisher et al., 1989; McConnell et al., 1987) as well for formation of the mitotic chromosome scaffold (Earnshaw et al., 1985; Earnshaw and Heck, 1985; Gasser et al., 1986) and plant nuclear matrix preparations (Rzepecki R. 2000). To date, the biological/biochemical bases for these well-documented and ubiquitous effects of thermal stress have remained relatively obscure.

Lamins are type V intermediate filament proteins which play a critical role in all nuclear functions in Metazoan starting from mechanical and organizational functions supporting nuclear envelope, nuclear lamina, nuclear pore complexes, chromatin structure and subnuclear compartmentalization as well as involvement (directly and/or indirectly) in replication, regulation of transcription, splicing, transport as well as a hub or platform for integrating nucleo-cytoplasmic signalling (Dechat *et al.*, 2010). Lamins and interacting proteins are also directly involved in the positioning and transport of cell nuclei within cells as well as in mechanical properties of cell nuclei, mechanosensing (Osmanagic-Myers, Dechat and Foisner, 2015) and mechanotransduction of signals from other parts of the cell and extracellular matrix (Iyer, Folker and Lovering, 2021); (Donnaloja *et al.*, 2020). All of these functions lamins play directly or indirectly by forming different protein complexes within different nuclear subcompartments. It has been commonly believed that most of these functions of lamins are regulated by phosphorylation/dephosphorylation on specific, evolutionally conserved sites, with the help of prolyl-protein isomerase, which affect particular lamin particles polymerization state, location, solubility, interactions with other protein (or protein complexes) and interactions with chromatin components such as histones, non-histone proteins and DNA (Machowska et al. 2016; Dubinska-Magiera et al. 2015).

Typically, metazoan lamins are divided into two types: A-type lamins which in mammalian somatic cells are represented by lamin A and lamin C proteins translated from alternatively spliced *LMNA* gene and B-type lamins, represented by lamin B1 and B2 proteins which are translated in somatic cells from separate *LMNB1* and *LMNB2* genes. Lamin C variant and lamin B3 (from *LMNB2*) are synthesized in sex-related tissues. In *Xenopus* and Teleostea? fish there are extra copies of lamin A and lamin B genes, in *C. elegans* there is only a single lamin Ce and in *D. melanogaster* we have two genes and two lamin proteins: lamin C of A-type and lamin Dm of B-type (Palka et al. 2018), (Rzepecki and Gruenbaum 2018). The latter has all typical functional protein domains and phosphorylation sites as mammalian lamins homologs. Fly lamin Dm exists as different isoforms depending, as we commonly think, on the phosphorylation

pattern.

It has been demonstrated that many different phosphorylation sites can be modified (for review see Machowska et al. 2015) but old  $^{32}\text{P}$  labelling studies demonstrated that the average number of phosphorylations per single protein does not exceeds 2-3 moieties per protein (Rzepecki and Fisher, 2002); (Zaremba-Czogalla, Dubińska-Magiera and Rzepecki, 2011); (Schneider *et al.*, 1999)). In western blots, lamin Dm fractions migrate at different positions and were named Dm1, Dm2 (so-called interphase forms) and mitotic isoform designated as Dm<sub>Mit</sub>). Conversion between Dm1 and Dm2 forms has been attributed to S25 phosphorylation (Stuurman, Maus and Fisher, 1995). Mitotic, soluble fraction has been thought to arise, similarly to vertebrate lamins by phosphorylation of two Cdk1-specific sites called “mitotic sites” (for review see Machowska et al. 2015).

Contradictory to lamins, topoisomerase II (Top2) structural and organizational roles, especially in interphase cell nuclei have not been studied so deeply. Top2 studies focused mostly on the enzymatic role (Berger et al., 1996; Roca et al., 1996; Roca and Wang, 1994) in the maintenance of proper topology of DNA in chromatin, unwinding during transcription and replication focusing on its primary role in the topology of condensing DNA into mitotic chromosomes sister chromatids resolution and structural role in building of mitotic chromosomal scaffold. *In vivo*, Top2 is essential at mitosis (Buchenau et al., 1993; DiNardo et al., 1984; Holm et al., 1985; Iwai et al., 1997; Rattner et al., 1996; Shamu and Murray, 1992; Uemura et al., 1987) where participation in chromatin condensation (Adachi et al., 1991; Garinther and Schultz, 1997; Wood and Earnshaw, 1990) and in formation of the mitotic chromosome scaffold (Earnshaw et al., 1985; Earnshaw and Heck, 1985; Gasser et al., 1986) were implicated. It is similarly important in meiosis (Klein et al., 1992; Moens and Earnshaw, 1989; Rose and Holm, 1993; Rose et al., 1990). As with lamins, a structural role for Top2 in organizing interphase nuclei was previously suggested (Berrios et al., 1985; Fisher, 1989; Meller et al., 1995; Whalen et al., 1991) while the biochemical mechanisms underlining these ubiquitous interactions with RNA and DNA and enrichment in nuclear matrix upon thermal stress are mostly still elucidated. Interestingly studies from *Drosophila* tissue culture cell models identified several *in vivo* binding sites for Top2 as well as the induction of new binding sites upon thermal stress induction. At least some of them are directly related to so-called heat shock loci in *Drosophila* (Girard *et al.*, 1998).

Our previous studies of Top2 in *Drosophila* confirmed the existence of a heterogeneous population of Top2 fractions in fly tissue culture cells and embryos. We have detected different populations of Top2 with different solubility properties, interactions and phosphorylation status. We reported a correlation of phosphorylation with enzymatic activity of Top2 fractions and reported the C-terminal Top2 domain as phosphorylated and necessary for interactions and regulation of activity (Rzepecki and Fisher 2000). We demonstrated that during mitosis there are two distinct populations of Top2: one associated with mitotic chromosomes and the second dispersed through the cell. The latter can be recovered as a P130 fraction. We also demonstrated, using *in vivo* photo-crosslinking, IP and  $^{32}\text{P}$  labelling method that Top2 binds to DNA and RNA *in vivo*

during interphase and mitosis and the critical for binding domain lays within 200 aminoacid residues of the C-terminal Top2 protein fragment (Rzepecki and Fisher 2000). In the case of fly lamins we previously discovered that lamin Dm do bind *in vivo* DNA and RNA during interphase but not during mitosis while lamin C did not bind to nucleic acids at all in our tests (Rzepecki et al. 1998). Fly lamins similarly to mammalian lamins undergo specific phosphorylation/dephosphorylation during the cell cycle *in vivo* (Zaremba et al. 2011; Machowska et al. 2015) Analyses of the function of single phosphorylation sites in lamins, using pseudo-phosphorylation mutants demonstrated that single phosphorylation on S37 (Cdk1-N-terminal site) on lamin C induces the solubility while for lamin Dm both N-terminal and C-terminal Cdk1-1 (mitotic sites) and to the lesser extent also S25 increased solubility (Zaremba-Czogala et al. 2012). All single pseudo-phosphorylation mutants tested except lamin C S37E did bind to decondensed chromatin in an *in vitro Xenopus* assembly system. Expression of the mutants in insect Kc cell line and HeLa cells resulted in atypical distribution (partly cytoplasmic, intra-nuclear diffused, decreased presence at NL) for lamin Dm single mutants: S45E, T435E and to the lesser extent S595E which indicates the correlation between phosphorylation, solubility, intracellular distribution, DNA/chromatin binding and properties of lamins depending on phosphorylation pattern and phosphosite. Since lamins and Top2 are identified as major karyoskeletal proteins, with an enhanced presence in NM upon stress induction, which has been correlated with the induction of new, heat shock-specific binding on DNA we decided to look closely into the molecular mechanisms regulating lamins and Top2 interactions upon stress induction. We analyzed the effect of thermal stress on selected, most important properties and interaction of lamins, Top2 and other important nuclear proteins for their subcellular distribution, solubility, phosphorylation, interactions, chromatin binding and their modulations upon reversible thermal stress induction.

## **MATERIALS AND METHODS**

### **Antibodies**

Affinity-purified rabbit anti-lamin Dm and domain-specific rabbit anti-Top2 II antibodies used in this study have been previously described (Rzepecki R. and Fisher P.A., 2000). Guinea-pig anti-LBR was a generous gift from Georg Krohne, University of Werzburg, Germany (Wagner *et al.*, 2004). Mouse monoclonal antibodies ADL67.10, ADL84.12, and LC28.26 were from Developmental Studies Hybridoma Bank (DSHB). Mouse and rabbit anti- $\alpha$ -tubulin were from DSHB (clone 12G10) and ThermoFisher (#PA5-29444), respectively. The monoclonal rat anti-Hsp70 antibody (NBP2-59342) and rabbit polyclonal antibody against histone deacetylase I HDAC1 (#NB500-124), were from Novus Biologicals. The rabbit polyclonal antibody anti-Hsf was custom-made for us by ThermoScientific. Additional immunofluorescence staining was performed with the rat anti-Hsp90 (#ab13494) and rabbit anti-Pol2PS5 (#ab5131) both from Abcam, and rabbit anti-HP1 (#NB110-40623) from Novus Biologicals. The secondary antibodies were from Jackson Immunoresearch. The HRP conjugated antibodies anti-mouse (#715-035-151), -rabbit (#111-035-144), and -rat (#712-035-153) were used to visualize membranes

after immunoblotting. Secondary antibodies anti-mouse used to visualize immunofluorescence were coupled to TRITC or DyLight649 (#715-025-151, #715-495-150). Antibodies anti-rat were coupled to TRITC (#712-025-153), while antibodies against rabbit were coupled to Alexa488 (#711-545-152).

### **Western Blot analysis**

Proteins were separated on polyacrylamide gels (in the concentration in the range between 7% and 12% depending on the experiment) according to Laemmli, 1970 and then electrophoretically transferred to nitrocellulose membranes according to Harlow and Lane, 1988 (0,45µm; Amersham Protran) using Bio-Rad's Mini Trans-Blot Cell set. To estimate protein sizes prestained protein ladder from ThermoFisher (#26616) was used. After 1h of blocking with 5% non-fat milk in PBST (PBS, 0,075% Tween-20), the membrane was incubated with primary antibodies over night at 4°C then washed with PBST and incubated with secondary antibodies conjugated with HRP for 1,5h at RT. Proteins were detected by using SuperSignal™ West Pico PLUS Chemiluminescent Substrate (ThermoFisher #34580) or Clarity Western ECL Substrate (Bio-Rad #1705061). Images were acquired and quantified using the ChemiDoc MP Imaging System (Bio-Rad) and the software Image Lab V5.2 (Bio-Rad).

When reactivity was visualized colourimetrically calf alkaline phosphatase-conjugated goat anti-IgGs antibodies and/or horseradish peroxidase coupled with donkey anti-IgGs with proper single or both substrates.

### **Immunofluorescence**

Cells were cultured on gelatin-coated cover slides for 24 h and heat shocked if necessary before fixation. Cells were fixed with 4% paraformaldehyde, permeabilized with 0,5% Triton X-100 PBS solution and blocked with 5% FBS PBS solution respectively.

Before fixation, the embryos were subjected to chemical dechoriation (3 min, 5% sodium hypochlorite) and then rinsed with water. Embryos were fixed with 4% PFA (300 µl) with heptane (1 ml) at RT for 20 min. After incubation, buffer was removed and the embryos were suspended in 1 ml of methanol, washed twice with PBS and then hydrated with PBS with 0.1% Triton X-100 for 30 min at RT. Permeabilization was carried out for 30 min in PBS with 0.5% Triton X-100 at RT with stirring. Finally, the embryos were washed with PBS and stained as described below.

Subsequently, cells and embryos were stained with primary antibodies overnight at 4°C and after that secondary antibodies at RT for 1.5 h.

PLA staining with Duolink PLA Multicolor Reagent Pack (Sigma-Aldrich, #DUO96000) was performed according to manufacturer instructions. Primary antibody incubation was performed for 16 hours at 4°C, slides were washed with PBS, and incubated in secondary antibodies PBS solution for 1,5h at RT. Slides were washed with PBS and mounted with VECTASHIELD medium with DAPI. PLA staining has been performed on Kc cells and third-instar larvae. Prepared samples were stained according to

manufacturer protocol. Microscope images were collected with a Leica SP8 confocal microscope and adjusted with a Fiji image processing package.

### **Nucleases and nuclease digestion**

Nucleases and nuclease digestions were carried out exactly as described previously (Rzepecki et al., 1998). To study the sensitivity of <sup>32</sup>P-labeled nucleic acid photo-crosslinked to Top2, nuclease digestions were performed for 30 min at 37° C with final concentrations of 66 µg/ml of DNase I and 60 µg/ml of RNase A. All nuclease digestions were performed in a solution containing 20 mM Tris-HCl pH 8, 150 mM NaCl, 0.1 % (v/v) Triton X-100 and 0.02 % (w/v) SDS (Buffer IPA) supplemented with 5 mM MgCl<sub>2</sub> and 2.5 mM CaCl<sub>2</sub>.

### ***Drosophila* embryos and cell cultures**

*D. melanogaster* Oregon R-P2 strain (RRID:BDSC\_2376) came from Bloomington Drosophila Stock Center, Bloomington, USA (NIH P40OD018537). Embryos were collected in special egg-laying cages. Flies were transferred from standard medium (corn grits, corn flour, sugar, yeast and bacteriological agar) to cages with embryo assembly medium (apple juice, cherry syrup, bacteriological agar, coated with yeast paste). The flies were allowed to lay embryos for 11 hours and then a 1-hour heat shock was performed. The analyzed embryos were in the age range from 1 hour to 12 hours old. After induction of heat shock, the embryos were rinsed with water from the medium to special strainers with a nylon filtration fabric NITEX (40 µm). The chemical dechorionation procedure was carried out successively using sodium hypochlorite (commercially available bleach). Then embryos were washed with a washing buffer (5 mM NaCl, 20 mM Tris-Cl pH 7.5, and freshly added protease and phosphatase inhibitors).

Kc cells (ECACC #90070550) and S2 cells (Drosophila Genomics Resource Center; Stock 6; <https://dgrc.bio.indiana.edu/stock/6>; RRID:CVCL\_TZ72, a kind gift from Department of Cytochemistry, University of Wroclaw, Poland) were cultured in Schneider's Drosophila Medium (Gibco #21720024), complemented with 10% fetal bovine serum (Sigma #7524) and 1% antibiotic-antimycotic (Gibco #15240062) at 23°C without additional CO<sub>2</sub>. Cells were plated on a 10 cm culture dish 24 hours before each experiment. Cell collection was performed by gently scratching cells from culture plates and pelleting by centrifugation. Cell pellets were re-suspended in the Laemmli loading buffer and heated at 95°C for 10 minutes before WB analysis. For heat shock induction material (embryos, larvae and cells) were shifted to 37°C and maintained at this temperature for 1h (or a certain amount of time as indicated in the text). Recovery was initiated by a return to 23°C for an additional: 6, 24, 48, and 72 h respectively.

### **BrdU incorporation in Kc cells**

Kc cells used in this experiment were the generous gift of Dr. John Watson (UCSF) and were maintained according to Berrios et al. (Berrios et al., 1991). For routine 5-bromo-2-deoxyuridine (BrdU) incorporation, quantified with an anti-BrdU monoclonal antibody

as previously described (Rzepecki et al., 1998), 200 ml of exponentially growing cells ( $1.2-1.8 \times 10^6$  cells/ml) were made 20  $\mu$ M BrdU and maintained in culture for an additional 26-27-hours (Rzepecki et al., 1998). 5-bromo-2-deoxycytidine (BrdC) incorporation was achieved similarly.

## **Solubility assay**

### **Kc cells and S2 cells**

Cells were plated 24 h before the experiment ( $2,5 \times 10^6$  cells/ml). After heat shock induction cells were scratched from plates, shifted to 15 mL tubes, and collected by centrifugation at 500 x g for 5 minutes and washed with PBS. Cell pellets have been suspended in extraction buffer (5 mM MgCl<sub>2</sub>, 50 mM NaCl, 50 mM Tris-HCl pH 7,5, 250 mM sucrose, 0,1 m EDTA, 1% Triton X-100 and freshly added protease and phosphate inhibitors). After mechanical homogenization, the prepared lysate was incubated for 20 min on ice (control - the cell lysate was taken before further steps). Then centrifugation was performed (10 000 x g, 10 min, 4 °C) and the supernatant was collected (fraction of proteins soluble in 50 mM NaCl), the pellet was resuspended in the same buffer as above with 150 mM NaCl and incubated for 20 min on ice, then centrifuged and the next fraction was collected (soluble in 150 mM NaCl). Further, it has proceeded with a 500 mM NaCl extraction buffer. Collected samples were boiled in a denaturing buffer (5% DTT and 40 mM DTT) for 10 min at 96°C and prepared for SDS-PAGE in the standard Laemmli loading buffer.

### **Embryos**

Collected and washed embryos were suspended in the extraction buffer (the same as in the cells section) in the proportion of 25 mg of embryos to 125  $\mu$ l of the buffer. The next steps of extraction were carried out analogously to those described above.

## **RNA extraction and first-strand cDNA synthesis**

Semi-adherent Kc cells were plated at the density of  $2,5 \cdot 10^6$  cells per ml of Schneider medium on the 6 cm cell culture plate. (In a total of  $1,5 \cdot 10^7$  cells.) After 24h medium was aspirated and cells were washed once gently with PBS. Then the first - lysis buffer from the Universal RNA Purification Kit (Eurx) was added and all further procedures were performed following the manufacturer's protocol. DNA-se I (Eurx) treatment was performed. The RNA concentration and purity were evaluated with NanoPhotometer® N60 (IMPLEN). RNA samples with an absorbance ratio of A 260/280 over 2,2 and A 260/230 over 2,2 were used for further analysis. The quality of the RNA samples was verified on 1 % native gel electrophoresis.

Single-stranded cDNA was synthesized from 2  $\mu$ g of total RNA in a final volume of 10  $\mu$ L. For this purpose, the Maxima First Strand cDNA Synthesis Kit for RT-qPCR (Thermo Scientific) was used and the manufacturer's instructions were followed. cDNA was stored at -20 °C for future use.

RNA extractions and cDNA synthesis from all samples were performed for three biological replicates.



### **Real-time quantitative PCR analysis**

qPCR was performed using Power SYBR Green Master Mix (Applied Biosystems). All reactions were performed under the following conditions: 1) UDG activation 50°C for 2 min, 2) Dual-Lock DNA polymerase 95°C for 2 min, 3) 40 cycles of denature and anneal/extend 95°C for 1 s and 60°C for 30 s. The specificity of the reaction was verified by melting curve analysis. All qPCR experiments were performed using QuantStudio™ 5 Real-Time PCR System.

### **Gene expression analysis**

For each well of the plate, the threshold crossing value (Ct) was calculated by the thermocycler manufacturer software. Other analyses were carried out based on the comparative Ct method. Values were normalized to the most stable gene in the dataset. Statistics between N and HS groups were calculated using t-Student tests.

### ***In vivo* photo-crosslinking**

*In vivo*, photo-crosslinking was performed as described previously (Rzepecki et al., 1998); (Rzepecki and Fisher, 2000). The hand-held lamp (UVGL-58, UVP Inc., San Gabriel, CA, 10 hours ) emitting 366-nm light was used. All quantities refer to 200 ml of cell culture starting material. In experiments with distamycin, cells were grown, harvested, washed and re-suspended in 8 ml of PBS, exactly as described before. However, before illumination, cell suspensions were made with 50 µM distamycin A3 and/or chromomycin (Sigma). After antibiotic addition, cell suspensions were incubated for 30 min at RT and then subjected to illumination with 366 nm light as described above.

### **Immunoprecipitation and <sup>32</sup>P-end-labeling of co-immunoprecipitated nucleic acid**

The entire procedure has been described previously (Rzepecki et al 1998; Rzepecki and Fisher 2000). After *in vivo* photocrosslinking, cells were lysed for cell fractionation or lysed directly and denatured by the addition of SDS and DTT (final concentrations of 5% and 20 mM, respectively); after the addition of SDS and DTT, samples were boiled for 10 min. Typically, about  $6 \times 10^8$  cells were harvested, resuspended in 1,5 ml PBS, lysed and either denatured immediately or fractionated and then denatured by the addition of a solution containing 10 % SDS and 40 mM DTT. Whole-cell lysates and/or subcellular fractions prepared in this way were stored at -20° C until use. Samples, each derived from about  $1.5 \times 10^7$  cells, were thawed by boiling for 10 min, cooled to room temperature and trichloroacetic acid (TCA) was added to a final concentration of 10 %. Samples were then incubated for 10 minutes at room temperature and precipitated proteins were collected by centrifugation, also at room temperature, for 10 min at 10,000 X g. The supernatant was discarded, 5 µl of 1.5 M Tris-HCl pH 8.8 was added to the protein pellet and the pellet was dissolved in 200-µl of a solution containing 20 mM Tris-HCl pH 8, 150 mM NaCl, 0.1 % Triton X-100 and 0.02 % SDS (Buffer IPA). Immediately before use, Buffer IPA was supplemented such that the final concentration

was 2.5 mM CaCl<sub>2</sub>, 0.5 mM PMSF, 1 mM TPCK, 1 mM TLCK, 1 µg/ml leupeptin and 1 µg/ml pepstatin. Unless indicated otherwise, 5 µl of micrococcal nuclease (680 µg/ml; Boehringer) was then added and samples were incubated for 60 minutes at 37 °C. Immunoprecipitation was performed as modified by Rzepecki et al. (Rzepecki et al., 1998; Smith et al., 1987).

## **Crosslinking co-immunoprecipitation**

### **Cells collection and crosslinking**

HS induction and cell collection were performed in the same manner as for the solubility assay.

Pelleted cells (25 mln) were resuspended in 2 ml of cross-linking reagent – 1% paraformaldehyde (PFA) and incubated for 7 min with gentle rotation on a rotary agitator at RT after incubation cells were immediately centrifuged for 3 min, 1000 x g at RT. Pelleted cells were resuspended in 1 ml of 125 mM glycine solution (to quench the PFA and terminate the cross-linking process) incubated on a rotary for 5 min and centrifuged at 4°C.

Next, cells were washed with cold PBS with proteases and phosphatases inhibitors, centrifuged, and resuspended in lysis buffer (50 mM Tris-Cl pH7,5; 150 mM NaCl, 1 mM EDTA, 1% Triton X-100, 0,1% SDS, Halt Protease and Phosphatase Inhibitor Cocktail from ThermoScientific) and transferred to 1,5 ml tubes. Mechanical homogenization was performed with plastic pestles with the following incubation for 20 min on ice. The prepared lysate was sonicated (Bandelin Sonoplus Mini 20) for 25 minutes at 90% amplitude with a pulse (30 sec ON-OFF cycles). The sonication has been optimized to obtain a homogenous trace of DNA <500 bp with no protein loss. After sonication lysate was centrifuged at 8000 x g, 10 min at 4°C. The supernatant was taken for further steps.

### **Co-immunoprecipitation**

According to the manufacturer manual, 25 µl of the Pierce Protein A/G Magnetic Beads (ThermoScientific # 88802) per sample was used. Initially, 200 µl of cell lysate with 10 µg of primary antibody (anti-lamDm, anti-Top2) were rotated for 1,5 h at RT (volume adjusted to 500 µl with lysis buffer). Then the antibody-lysate mixture was transferred to previously washed beads and incubated for 1 h at RT with rotating. The beads were collected with a magnetic stand (ThermoFisher #CS15000) between each washing step. Before the first wash, the flow-through fraction (excess of unbound antibodies and lysate) was collected for further analysis. Elution was performed by adding 100 µl of Laemmli buffer and heating samples for 10 min at 96°C. After cooling, the supernatant was collected.

The negative control in the experiment was samples treated identically, except the antibodies – as an isotype control normal polyclonal rabbit IgG was used (R&D Systems, #AB-105-C).

The 10 µl of each sample was loaded onto polyacrylamide gel together with corresponding controls (input, negative control, and flow-through fractions) and proteins were detected by immunoblotting using primary antibodies (anti-lamDm, anti-Top2, anti-

LC28.26) followed by HRP-conjugated anti-rabbit or anti-mouse IgG (described in *Antibodies* section).

### **Cell fractionation of <sup>32</sup>P labelled and UV cross-linked cells**

Cell fractionation was performed according to (Rzepecki and Fisher 2000); see also Meller et al. (Meller et al., 1994).

### **Quantification by scanning densitometry**

Unless stated otherwise, immunoblots and autoradiograms (or PhosphorImager scans) were quantified using an LKB Ultrascan XL laser densitometer (LKB Instruments Inc., Gaithersburg, MD).

### **Quantitative densitometry analysis of protein level and solubility assay**

Bands detected by immunoblotting were quantified using Bio-Rad Image Lab with the use of the volume tools. The area of the stained band was marked with a rectangle (the areas were identical for each band on the membrane). The mean value of intensity was acquired from the generated analysis table.

For protein level estimation the signal intensity value for a protein of interest was normalized to the signal intensity from housekeeping proteins (e.g. tubulin).

For the solubility assay, each of the successive fractions (50 mM, 150 mM and 500 mM) was plotted (Fig 5A, B and SupFig5B) as the percentage of output lysate which was considered as 100% for each replicate. The statistic shows the comparison of normal versus heat shock conditions for each fraction. For figures SupFig4 and SupFig5C the acquired signal intensity value presented on the graph was normalized to the mean value of all intensity values for an examined fraction. Only the N and HS values within a fraction were compared with each other.

### **Statistical analysis and data presentation**

Statistics (Fisher's exact test and t-test unless indicated otherwise in the text) were calculated using Microsoft Excel. Quantified data were plotted using GraphPad Prism 8.0 The details of experimental replicates and statistical analysis are mentioned in the corresponding figure legends. Independent experiments mentioned in the figure legends indicate biological replicates.

#### **Data availability**

All data associated with this manuscript have been deposited on the Faculty of Biotechnology, University of Wrocław server. Please contact the Authors for login details.

## RESULTS

### Induction of heat shock and recovery in *Drosophila* tissue culture cells and embryos

For this study, we have chosen a fly cell culture model system based on Kc and S2 cells and whenever possible we have also tested embryos and larvae at desired stages. Lamin Dm is present in both cell types and at all stages of fly development while lamin C protein is present only in Kc cells and appears in embryogenesis after about 8- 9 hours (Riemer et al. 1995). We tested first the conditions and reversibility of thermal stress induction (heat shock, HS) and recovery time (R) using inducible Hsp70 protein as an HS marker. Figures 1A and 1B demonstrate that HS induction can be easily detected and followed in IF in Kc and S2 cells and Panel C illustrates the time frame of Hsp70 protein induction, detected by WB in Kc and S2 cells respectively. Panel D illustrates the level of selected marker HS inducible genes including *Hsp70*. Figure 1 – Figure supplement 1 demonstrates Hsp70 induction and recovery in embryos using IF. Altogether it is evident that the HS effect in all samples is typical and fully reversible. Based on the remaining levels of Hsp70 proteins in WB experiments similar to those demonstrated in Fig1C we have chosen 48/72 hours as best for recovery time for S2 and Kc cells respectively while as the optimal time for HS induction, we set 1h. Since HS affects the expression of many genes we have tested several genes or their combinations as references for RT-qPCR analyses for normal, HS and R conditions. Based on our analyses (Figure 2 – figure supplement 1A) the most stable seems to be ribosomal RNAs, actin5C and tubulin84B. According to geNorm analyses (Figure 2 – figure supplement 1B) these genes are also detected as having the most stable transcripts comparing HS versus N.

Therefore we have chosen as references for RT-qPCR 18S/28S ribosomal RNA, actin5C and tubulin84B. Please note that we have detected the transcript for lamin C in S2 cells, but this signal was visible only after at least 7 cycles after lamin Dm transcripts have been detected and WB do not detect lamin C protein in S2 cells.

Quantitative analyses of transcripts for lamin Dm, lamin C, Top2 and Hsf using RT-qPCR indicated that their transcript levels do not change significantly but for lamins and Top2 we observed a tendency for decrease while for Hsf increase in level in both cell lines (Figure 2A). Comparison in induction of typical HS genes revealed that stress induction of their transcript is slightly lower in S2 than in Kc cells (Fig2B). All primer sequences used in this study are included in Figure 2 – figure supplement 2.

We also tested the level of selected proteins during the HS induction and recovery in Kc and S2 cells using western blotting. For Kc cells, we have not observed any statistically significant changes in the level of Top2, both lamins, HDAC1 and Hsf (Fig2C). Please note the modified mobility of the Hsf protein band which is phosphorylated upon HS. Interestingly, HS induces changes in proportions between lamin Dm isoforms-induces the conversion of lamin Dm1 (lower band) into Dm2 isoform as seen in blots stained with rabbit polyclonal antibodies anti lamin Dm (see also Fig6G). Since the effect is

reversible together with HS reversion we suggest it is HS-specific lamin modification. It has been reported previously that fly lamin conversion from Dm1 into Dm2 is correlated with phosphorylation of N-terminal fragment and at least one phosphosite was identified as S25 (Stuurman, Maus and Fisher, 1995). To confirm the conversion of lamin Dm upon HS induction we have used monoclonal antibodies ADL84 specific for N-terminal lamin Dm fragment which recognize only lamin Dm when S25 is not phosphorylated. Please note that phosphorylation of S25 abolishes recognition by these antibodies (Stuurman, Maus and Fisher, 1995); see also (Zaremba et al. 2011). Western blotting using this antibody identifies a single band and its optical density decreases upon HS and returns to normal level upon recovery (Fig2C). Densitometry analyses (illustrated by diagram in 2C; see also Fig3B) of this staining indicate that the change is statistically significant. Similar analyses performed on S2 cells using WB are illustrated in Figure 2D and associated diagrams from densitometry analyses. S2 cells differ in stress response from Kc cells since we detected a significant increase in Top2 level, less significant conversion of lamin Dm into Dm2 form (S25 specific phosphorylation detected via ADL84 staining), slightly increased levels of Hsf and HDAC1 proteins (see also Fig3C).

Since phosphorylation of lamins can affect the properties and interactions of lamins we looked into the phosphorylation of lamin Dm more deeply focusing on new experiments entirely on lamin Dm. Immunofluorescence analyses using ADL84 monoclonal antibodies indicate the partial disappearance of the signal for lamin Dm upon HS induction (Figure 3A). Western blot analyses of Kc cells nicely illustrate the conversion of lamin Dm1 fraction into lamin Dm2 fraction- the disappearance of ADL84 signal and change in the proportion of lamin Dm isoform in polyclonal Ab staining. Densitometry of western blotting confirms that the changes are statistically significant. A similar experiment on S2 cells also confirmed the conversion of lamin Dm1 into lamin Dm2 by S25 phosphorylation (Figure 3C) and its statistical significance.

Since thermal stress induces new *in vivo* binding sites for Top2 on chromatin and affects the compositions of isolated karyoskeletal structures (nuclear matrix/chromosomal scaffold) we looked into the distribution of Top2 protein upon thermal stress and recovery (Figure 4). Immunofluorescence analyses of Kc cells for Top2, Hsp70 and lamin Dm indicated relocation of Top2 upon HS induction from intranuclear mostly “homogenous” distribution into lateral distribution with frequently observed spherical Top2 “bodies/granules” (Fig4A, (arrowheads)). For lamin Dm staining we observed no detectable changes in distribution but detected lower fluorescence intensity. No changes in the distribution of lamin C were observed (Fig4C). In embryos, we also detected relocation of Top2 into the peripheral, NL-related location with a general decrease of the signal which was reversible (Fig4B and D). This was confirmed by optical density scanning demonstrating intra-nuclear signal disappearance upon HS induction. The effect was reversible. Quantification data indicate the statistical significance of the redistribution of Top2 into nuclear lamina fraction. To test if redistribution of Top2 is correlated with redistribution of DNA we choose third instar larvae nuclei which are poliploidic but not polytenic and have nicely detected chromatin.

Figure 4F demonstrated the relocation of chromatin to nuclear lamina regions which was calculated to be statistically significant. For lamin Dm, we detected in Kc cells a decrease of the signal while in embryos and especially in larval nuclei we detected less “diffuse” staining for lamin and increased intensity of the signal at the NL (e.g. Fig4E and F respectively). Please also look at the supplementary material with additional immunofluorescence staining (Figure 4 – figure supplement 1 and 2 for Kc cells and embryos, respectively)

Since HS affects the distribution of Top2, lamin and chromatin we tested the solubility of lamins, Top2 and other nuclear proteins in Kc cells, S2 cells and embryos as well (Figure 5 and Figure 5 – figure supplement 1 and 2) with 50 mM, 150 mM and 0,5 M NaCl in buffer comparing normal condition and heat shock induction.

We detected significant changes in solubility of lamin Dm-increased level of protein in high salt extracts in Kc cells, decreased soluble fraction of Top2 protein (50 mM NaCl), decreased soluble fraction of HDAC1 and increased level of high salt (0.5 M NaCl) fraction of protein. Similar results were obtained for Hsf protein-significant decrease in the soluble fraction of protein and an increase in high salt fraction (Figure 5A). Similar experiments in S2 cells detected for lamin Dm significant changes only in medium salt concentrations (less soluble; 150 mM NaCl) fraction, no significant changes in Top2, but changes in HDAC1 and Hsf solubility-decrease in soluble fraction and increase in high salt fraction (Figure 5B). Similar data were also obtained for embryos (Figure 5 – figure supplement 1)

Since in earlier studies on Top2 and lamins, we confirmed that both proteins bind to chromatin and nucleic acids *in vitro* and *in vivo* and we also got preliminary data suggesting their possible interactions we decided to look for the binding partners for lamins and Top2. Immunofluorescence analyses of the distribution of lamin Dm and Top2 demonstrate that most of the proteins are located separately within typical cell nuclei with lamin Dm at the nuclear lamina and Top2 more or less evenly dispersed within nuclear interior/entire cell nuclei (Figure 6A see also Fig4) this is correct for cell in cell culture and in embryos and larvae. Panel 6A demonstrates merged staining for lamin Dm and Top2 in larval cell nuclei: polyploid (both left and top right picture) and diploid (bottom right). Panel B demonstrates colocalization of lamin Dm and Top2 in Kc cells (top series) and polytenic nuclei of salivary gland cells of the third instar larvae (bottom series) using proximity ligation assay technique (PLA) using anti lamin Dm monoclonal ADL67 antibody and affinity purified anti Top2 antibodies. Panel C demonstrates magnifications of a single Z-section from movies (see also Figure 6 – movie 1) from IF analyses of control (left), PLA (single, middle section) and merged sections (right). Please note that the colocalization signal was detected not only at the contact of chromatin with nuclear lamina but also on the surface of polytenic chromosomes inside cell nuclei.

Please also look at the supplementary material with corresponding movies (Figure 6 – movie 1).

We performed an immunoprecipitation experiment for lamin Dm using embryo extracts and anti-lamin Dm, affinity purified, rabbit polyclonal antibodies and detected lamin Dm

and Top2 proteins with ADL67 monoclonal and affinity-purified polyclonal antibodies for lamin Dm and Top2 respectively, using different amounts of extract loaded into each reaction. The result shown in Figure 6D demonstrates the co-immunoprecipitation of Top2 protein with lamin Dm and the correlation of the amount of bound lamin Dm and Top2 protein with the amount of extract loaded. Fig6E demonstrates co-immunoprecipitation of Top2 with lamin Dm from extracts from Kc cells (under native conditions) with additional S1 nuclease treatment (on beads) demonstrating the interaction is not nucleic acid dependent. Immunoprecipitation experiment performed under denaturing conditions on Kc cells (Figure 6F, IP anti-Lam Dm) (see also Figure 6 – figure supplement 1 for S2 cells) indicated that lamin Dm co-interacts with Top2 during normal conditions and after heat shock induction. Please note stronger Top2 band co-precipitating with lamin Dm during HS and modified proportion of lamin Dm fractions: Dm1 and Dm2 upon heat shock (Fig6G). Similarly, lamin Dm co-precipitates with Top2 and the intensity of lamin bands is stronger upon HS compared to normal conditions (Fig6F, co-IP anti Top2).

Therefore we performed PLA colocalization studies comparing the normal conditions and thermal stress induction (Figure 6H, I, J). We discovered that heat shock induction significantly increased the colocalization between lamin Dm and Top2 in Kc cells (Fig6H). Quantification of the signal indicates a significant increase in detected foci per cell nucleus upon stress induction in Kc cells (Fig6I). Figure 6J demonstrates the typical amount of foci detected in diploid cell nuclei and polytenic nuclei in third-instar larvae preparations.

To get better insight into the lamin Dm-Top2 interactions with chromatin, nucleic acid and themselves we decided to use our previously used technique of *in vivo* BrdU labelling, *in vivo* photocrosslinking, immunoprecipitation and 32-P labelling of nucleic acids bound to protein followed by WB and Phosphoimager analyses. The results of the experiment are demonstrated in Figure 7. IP for lamin Dm in such experiment detected co-immunoprecipitation of Top2 protein and association of labelled nucleic acids with Top2 (Fig7A, nuclease -) while additional treatment with nuclease to cleave off nucleic acid decreased the co-IP for Top2 which was correlated with labelled nucleic acid disappearance (Fig 7A nuclease +). Control experiments with IP anti-Top2 and IP anti lamin Dm with additional nuclease treatment (+) or not (-) (Fig7B) indicated that nuclease treatment simultaneously decreases the co-IP of both proteins in *in vivo* crosslinking procedure suggesting that at least some population of lamin Dm and Top2 has been crosslinked *in vivo* on nucleic acid (chromatin?) next to each other. Previous experiments with native IP and nuclease (Fig6E) indicated that only a fraction of co-IP was dependent on nucleic acids. Therefore we assume that both protein-protein (or protein complex-protein complex) and protein-nucleic acid-protein type complexes can exist for lamin Dm interaction with Top2. When we looked into the analyses of nucleic acids associated with Top2 and lamin Dm and the effect of thermal stress on the specificity of binding (Figure 7C) using an *in vivo* photolabelling procedure we detected preferential binding to DNA during normal conditions for both proteins and increase in proportion of binding to RNA upon heat shock induction. Since HS increased the

amount of lamin Dm and Top2 in insoluble, karyoskeletal fraction (nuclear matrix, chromosomal scaffold), and HS affected the solubility of proteins in our tests we tested the ability to bind nucleic acids of total fraction of particular protein and compare to soluble or insoluble, karyoskeletal fraction (Figure 7D). We discovered that lamin Dm highly bound to nucleic fraction appeared to be a soluble fraction while the least was the “insoluble” fraction of lamin Dm. For Top2 the most efficiently bound to nucleic acid was a soluble fraction of protein while the least associated with nucleic acids was a fraction insoluble. When we tested the overall efficiency of nucleic acid binding for lamin Dm and Top2 comparing normal conditions, stress induction and recovery we detected that heat shock dramatically increases the association of Top2 with nucleic acids and the effect is reversible upon recovery (Figure 7E). For lamin Dm, we detect an increase in the efficiency of nucleic acid binding upon stress induction and a decrease of binding upon recovery. We also decided to test the effect of a frequently used drug called distamycin (Kopka *et al.*, 1985; Majumder and Dasgupta, 2011) frequently used previously for probing of Top2 (Kas *et al.*, 1993) and lamin interactions with chromatin (Gasser and Laemmli, 1987); see also (Rzepecki *et al.* 1998); (Rzepecki and Fisher 2000) in our current *in vivo* photocrosslinking studies (Figure 7F). Comparison between normal and heat shock confirmed a stronger association of both proteins with nucleic acids during heat shock induction and as expected indicated the effect of distamycin on decreasing the binding of both proteins with DNA visibly but not completely which suggests high heterogeneity of the protein- DNA interactions. Figure 7G demonstrates the control experiment that none of the experimental procedures of BrdU labelling *in vivo* photocrosslinking induces a heat shock effect in Kc cells.



## DISCUSSION

*Drosophila melanogaster* tissues, especially salivary glands polytenic nuclei, together with tissue cultured cells such as Kc and S2 have been used as an important model for studies of cell nuclei functions and chromatin structure. The initial attempts at resolving the structure of skeletal structures of the cell nucleus as well as chromatin structure and organization within karyoskeletal structures, when the terms either of nuclear matrix/chromosomal scaffold, nuclear lamina or SAR/MAR DNA have been also performed very frequently on the fly model. The fly model has also been useful in the identification of lamins and Top2 protein as major karyoskeletal and nuclear matrix/chromosomal scaffold proteins and their content in karyoskeletal fractions, and their properties depend on preparation methods and condition of initial biological material used for preparation. For example, pretreatment of fly material at 37 centigrade or mammalian material at 42 centigrade (heat shock) resulted in a higher amount of lamins and Top2 in prepared karyoskeletal structures while RNase treatment along the procedure resulted in the almost complete loss of karyoskeletal proteins including lamins and Top2 from such preparations. Our and other papers on the role and properties of lamins and Top2 in the fly model demonstrated in vivo interactions of lamins and Top2 with both DNA and RNA and that they interact mostly with AT-rich regions of DNA. They exist in cells in different complexes with different posttranslational modifications which affect their properties of nucleic acid binding, nuclear import for lamins and activity for Top2. Therefore it was natural continuation for us to approach the question of the role of lamins and Top2 in the regulation of chromatin structure, gene expression and chromatin binding in normal conditions and during heat shock. For that purpose, we used well known, also for us, fly model system of Kc and S2 cells and if necessary and convenient fly tissues: embryos and larvae. Both cell lines have been widely used for mapping of in vivo Top2 binding sites at normal conditions and during heat shock by many laboratories and there have been many reports on the mapping of several, heat shock-induced Top2 binding sites.

For monitoring of heat shock effect induction we have selected an inducible form of Hsp70 protein for WB and IF studies and a set of inducible heat shock protein-coding genes for RT-qPCR. We have selected the HS induction time at 60 minutes just to allow for efficient transcription and translation into a protein of a first round of heat shock inducible genes which products should efficiently undertake transcription of secondary heat shock inducible genes with associated changes in chromatin structure and protein complexes associated with them. We have always tested the viability of cells during the experiment and recovery and found that the vast majority of cells fully recovered from the HS as measured by Hsp70 measurements (WB and IF). Since the transcripts of typical reference housekeeping genes were not fully stable during HS and recovery we selected a set of four reference transcripts as reference for RT-qPCR studies (18S/28S RNA, actin 5C and tubulin 84B). Interestingly, the level of induction of selected HSP genes is lower in S2 than in Kc cells.

Real-time PCR studies demonstrated no statistically significant changes in transcript levels, with threshold used, for lamins, Top2, and Hsf. This nicely correlates with stable protein levels for lamins, Top2 and HSF protein during normal condition HS and recovery.

WB analyses demonstrated reduced mobility of HSP70 protein in HS compared to normal and recovery which can be attributed to its phosphorylation upon HS. We also detected conversion of lamin Dm1 into Dm2 isoform (disappearance of the faster migrating band and strengthening of the slower band) upon HS compared to normal and recovery which indicates transient lamin phosphorylation, attributed to Hs and disappears upon recovery. Using S25-specific monoclonal antibody we demonstrated that this conversion is the result of at least one phosphorylation which takes place at S25. We demonstrated that this S25 phosphorylation is statistically significant in both Kc and S2 cells. Since we demonstrated previously using in vitro nuclear assembly system and transient transfection studies as well as solubility assay that lamin Dm S25 phospho-mimicking (pseudophosphorylation) mutant demonstrated, a lower percentage of alpha-helical structure, lower polymerization properties, higher solubility and lower affinity for association with chromatin (Zaremba et al 2012). This suggests that in vivo, upon HS such modified lamin Dm may be more soluble and may participate in new interactions, possibly also in different locations. Since mammalian lamin A when phosphorylated at the N-terminal domain at the N-terminal Cdk1 (“mitotic”) site relocates to the nuclear interior from the nuclear lamina we can speculate that S25 phosphorylation on lamin Dm may result in similar relocation and modified interactions. S25 in lamin Dm is not a Cdk1-specific site but epitope mapping studies on lamin Dm point mutants suggested that such modification may affect N-terminal lamin Dm structure up to the beginning of alpha-helical rod domain (see Machowska et al for details).

If studies indicated that upon HS a fraction of Top2 relocates from homogenous, intranuclear distribution into lateral, sub-lamina distribution with frequently seen, spherical top2-dense granules and the relocation is reversible. Since it was demonstrated previously that Top2 can exist in different fractions differing in interactions, solubility, phosphorylation and activity we may suggest that the relocation indicated that fraction of Top2 may interact with protein complexes at the nuclear lamina (with lamin Dm itself- manuscript on lamin Dm and Top2 interactome in preparation; see PhD thesis of Marta Rowinska). Other fractions present in “granules” may represent interactions with stress granules protein complexes forming at the cell nucleus. Indeed our Top2 proteome data confirm the Top2 complexes with stress granule proteins (PhD thesis of Marta Rowinska; manuscript in preparation). For lamin Dm we did not detect any relocation but a significant diminishing of the signal when using affinity-purified lamin Dm rabbit polyclonal antibodies which may suggest a sort of epitope masking and/or participation in multiprotein complexes. Indeed lamin Dm proteome studies confirm the latter (manuscript in preparation, PhD thesis Marta Rowinska). Top2 relocation upon HS was confirmed also on embryos which suggests that this is a common mechanism for Top2 relocation in response to HS. It should be pointed out that

detected relocations of proteins are fully reversible upon recovery. Please note that we have not detected any changes in lamin C mobility and location. Detection of statistically significant relocation of chromatin in third instar larvae polytenic nuclei to the nuclei periferan sub-lamina location together with lamin Dm disappearance from the nucleus interior and migration to the nuclear lamina, together with detected Top2 relocation to the nuclear lamina strongly suggest that the significant remodelling of chromatin interactions and Top2 and laminDm interactions as well as binding partners may occur. This suggests also the reorganization of chromatin, potential gene expression modification, which we know takes place upon HS, and modified lamin Dm and Top2 interactions with nucleic acids.

Solubility studies analyzed as an amount of particular protein present in a particular fraction upon sequential extraction confirmed our hypothesis that HS affect relocation and/or posttranslational modification which is also correlated with modified solubility which in turn suggests modified properties and/or interactions or both. We used three steps of extractions with such concentration of salt to reflect the most frequent conditions used for extraction of specific fractions of nuclear proteins. The lower salt concentration allows to maintenance of “soluble proteins” in isolated or lyzed cell nuclei while 150 mM salt extracts the majority of “soluble” proteins. Half molar salt has been typically used for extraction of a major fraction of lamins both in mammalian and fly model systems of tissue cultured cells. Since we detected statistically significant changes in the amount of most tested proteins in many fractions upon HS, with the highest frequency in 150 mM fraction, we may conclude that HS induces significant changes in properties and /or interactions of many proteins (lamin Dm and Top2 interactome studies (manuscript in preparation, PhD thesis Marta Rowinska indicate over 200 new or increased interaction upon HS for each protein). This is also nicely fit into previous studies’ results that different fractions of lamin Dm and Top2 were discovered in fly cells with different properties, phosphorylation, chromatin interaction and activity. Similar data were obtained on embryos. In S2 cells changes in Top2 “solubility” are not statistically significant so this might be the result of bigger errors in the experiment and an additional number of experiments may result in smoothing the standard deviations between samples or S2 differ in Top2 interactome. Indeed the obvious hypothesis is that this might be related to the cells’ specificity itself and or differences in protein content (e.g. lamins).

Immunoprecipitation studies demonstrated co-precipitation of lamin Dm with Top2 and Top2 with lamin Dm under native and “denaturing” (crosslinking) conditions. Surprisingly some of the lamin D -Top2 interactions were nucleic acid dependent which suggests that both proteins may interact or sit as neighbors on nucleic acid/DNA next to each other. Alternatively, they may interact indirectly with protein partners of complexes residing on DNA/nucleic acid. Please remember that both proteins interact in vivo with DNA and RNA (Rzepecki et al 1998, Rzepecki & Fisher 2000) while Top2 was found in complexes with RNA in fly cells. Although only a fraction of lamin Dm and Top2 interact and colocalize with each other, HS induction statistically significantly changes the colocalization between them in Kc cells and larvae cells as indicated by PLA studies.

Also, co-precipitation studies suggest that heat shock increased co-interaction. Interestingly lamin Dm co-precipitated with Top2 reflects the same pattern as the entire population of lamin Dm at HS-predominant Dm2 isoform and barely detected Dm1. This indicates that the phosphorylation state does not affect lamin Dm binding to Top2 and vice versa. Our experience in in vivo crosslinking and immunoprecipitation allowed us to get deeper into lamin Dm and Top2 interactions with chromatin. Detected increased binding of lamin Dm and Top2 to chromatin in vivo and a several-fold increase of binding by Top2 may be in agreement with previous studies on in vivo induced new HS-induced in vivo binding sites. The detection of both DNA and RNA bound is also in agreement with previous discoveries, also by us. The most interesting seems to be results from fractionation studies for in vivo crosslinking and chromatin binding studies. Identification of the “soluble” fraction of lamin Dm and Top2 as the most efficient in binding to nucleic acid confirms different properties of different fractions of both proteins in chromatin association. Since we detected relocation of the proteins upon HS and it has been confirmed that HS relocates lamin Dm and Top2 into an “insoluble” fraction we suggest this fraction has different interactome and may predominantly localize to nuclear lamina where the chromatin interactions with presumably heterochromatin (constitutive and/or HS induced) are maintained by other protein complexes while Top2 still retains or as PLA studies indicated increases its presence. Our studies on Top2 and lamin Dm proteome (manuscript in preparation) fully support such a hypothesis. The full recovery of “normal” Top2 and lamin Dm interactions upon recovery confirms that this is a reversible, fully physiological process by which cells evolved to survive and resist damage to the cells upon HS conditions. In order to interconnect lamin Dm and Top2 role upon stress induction with gene expression regulation and chromatin sites binding we analysed changes in lamins and topo proteome together with RNAseq and ChIPseq data (manuscripts in preparation). They nicely correlate with the data presented in this work.

## REFERENCES

- Adachi, Y., Luke, M. and Laemmli, U. K.** (1991). Chromosome assembly in vitro: topoisomerase II is required for condensation. *Cell* **64**, 137-148.
- Adam, S. A.** (2001). The nuclear pore complex. *Genome Biol* **2**, REVIEWS0007.
- Berger, J. M., Gamblin, S. J., Harrison, S. C. and Wang, J. C.** (1996). Structure and mechanism of DNA topoisomerase II [published erratum appears in Nature 1996 Mar 14;380(6570):179]. *Nature* **379**, 225-32.
- Berger, J. M. and Wang, J. C.** (1996). Recent developments in DNA topoisomerase II structure and mechanism. *Current Opinion in Structural Biology* **6**, 84-90.
- Berrios, M., Fisher, P. A. and Matz, E. C.** (1991). Localization of a myosin heavy chain-like polypeptide to *Drosophila* nuclear pore complexes. *Proceedings of the National Academy of Sciences of the United States of America* **88**, 219-223.
- Berrios, M., Osheroff, N. and Fisher, P. A.** (1985). In situ localization of DNA topoisomerase II a major polypeptide component of the *Drosophila* nuclear matrix fraction. *Proceedings of the National Academy of Sciences of the United States of America* **82**, 4142-4146.
- Berrios, S. and Fisher, P. A.** (1988). Thermal stabilization of putative karyoskeletal protein-enriched fractions from *Saccharomyces cerevisiae*. *Molecular and Cellular Biology* **8**, 4573-4575.
- Blake, M. S., Johnston, K. H., Russell-Jones, G. J. and Gotschlich, E. C.** (1984). A rapid sensitive method for detection of alkaline phosphatase conjugated anti-antibody on Western blots. *Anal. Biochem.* **136**, 175-179.
- Buchenau, P., Saumweber, H. and Arndt-Jovin, D. J.** (1993). Consequences of topoisomerase II inhibition in early embryogenesis of *Drosophila* revealed by in vivo confocal laser scanning microscopy. *Journal of Cell Science* **104**, 1175-85.
- Cohen, M., Lee, K. K., Wilson, K. L. and Gruenbaum, Y.** (2001). Transcriptional repression, apoptosis, human disease and the functional evolution of the nuclear lamina. *Trends Biochem Sci* **26**, 41-7.
- DiNardo, S., Voelkel, K. and Sternglanz, R.** (1984). DNA topoisomerase mutant of *S. cerevisiae* topoisomerase II is required for segregation of daughter molecules at the termination of DNA replication. *Proceedings of the National Academy of Sciences of the United States of America* **81**, 2616-2620.
- Dundr, M. and Misteli, T.** (2002). Nucleolomics: an inventory of the nucleolus. *Mol Cell* **9**, 5-7.
- Earnshaw, W. C., Halligan, B., Cooke, C. A., Heck, M. M. and Liu, L. F.** (1985). Topoisomerase II is a structural component of mitotic chromosome scaffolds. *J Cell Biol* **100**, 1706-15.
- Earnshaw, W. C. and Heck, M. M.** (1985). Localization of topoisomerase II in mitotic chromosomes. *J Cell Biol* **100**, 1716-25.
- Evan, G. I. and Hancock, D. C.** (1985). Studies on the interaction of the human *c-myc* protein with cell nuclei: p62<sup>c-myc</sup> as a member of a discrete subset of nuclear proteins. *Cell* **43**, 253-261.

**Fisher, D. Z., Chaudhary, N. and Blobel, G.** (1986). cDNA sequencing of nuclear lamins A and C reveals primary and secondary structural homology to intermediate filament proteins. *Proc Natl Acad Sci U S A* **83**, 6450-4.

**Fisher, P.** (1998). Preparation and Characterization of the Nuclear Lamina and Nuclear Lamina-enriched Fractions. D. Spector, R. Goldman and L. Leinwand, eds. Cold Spring Harbor Laboratory Press, Cold Spring Harbor, NY. *Cells: A Laboratory Manual*.

**Fisher, P. A.** (1989). Chromosomes and Chromatin Structure: The Extrachromosomal Karyoskeleton. *Current Op. Cell Biol.* **1**, 447-453.

**Fisher, P. A.** (1990). Effects of Thermal Stress on the Karyoskeleton. Insights into the Possible Role of Karyoskeletal Elements in DNA Replication and Transcription. In *The Eukaryotic Nucleus*, (eds P. Strauss and S. Wilson), pp. 737-762. Caldwell, NJ: The Telford Press.

**Fisher, P. A., Berrios, M. and Blobel, G.** (1982). Isolation and characterization of a proteinaceous subnuclear fraction composed of nuclear matrix peripheral lamina and nuclear pore complexes from embryos of *Drosophila melanogaster*. *J Cell Biol.* **92**, 674-686.

**Fisher, P. A., Lin, L., McConnell, M., Greenleaf, A., Lee, J.-M. and Smith, D. E.** (1989). Heat shock-induced appearance of RNA polymerase II in karyoskeletal protein-enriched (nuclear "matrix") fractions correlates with transcriptional shutdown in *Drosophila melanogaster*. *Journal of Biological Chemistry* **264**, 3464-3469.

**Fisher, P. A. and Smith, D. E.** (1988). Affinity purification of antibodies using antigens immobilized on solid supports. *Biochem. Soc. Transactions* **16**, 134-138.

**Garinther, W. I. and Schultz, M. C.** (1997). Topoisomerase function during replication-independent chromatin assembly in yeast. *Molecular & Cellular Biology* **17**, 3520-6.

**Gasser, S. M., Laroche, T., Falquet, J., Tour, E. B. d. I. and Laemmli, U. K.** (1986). Metaphase chromosome structure: Involvement of DNA topoisomerase II. *J. Mol. Biol* **186**, 613-629.

**Goldman, R. D., Gruenbaum, Y., Moir, R. D., Shumaker, D. K. and Spann, T. P.** (2002). Nuclear lamins: building blocks of nuclear architecture. *Genes Dev* **16**, 533-47.

**Gruenbaum, Y., Wilson, K. L., Harel, A., Goldberg, M. and Cohen, M.** (2000). Review: nuclear lamins--structural proteins with fundamental functions. *J Struct Biol* **129**, 313-23.

**Guillemin, K., Williams, T. and Krasnow, M. A.** (2001). A nuclear lamin is required for cytoplasmic organization and egg polarity in *Drosophila*. *Nat Cell Biol* **3**, 848-851.

**Harlow, E. and Lane, D.** (1988). *Antibodies: a laboratory manual*. Cold Spring Harbor, NY: Cold Spring Harbor Laboratory.

**Holm, C., Goto, T., Wang, J. C. and Botstein, D.** (1985). DNA topoisomerase II is required at the time of mitosis in yeast. *Cell* **41**, 553-563.

**Hutchison, C. J., Alvarez-Reyes, M. and Vaughan, O. A.** (2001). Lamins in

disease: why do ubiquitously expressed nuclear envelope proteins give rise to tissue-specific disease phenotypes? *J Cell Sci* **114**, 9-19.

**Iwai, M., Hara, A., Andoh, T. and Ishida, R.** (1997). ICRF-193, a catalytic inhibitor of DNA topoisomerase II, delays the cell cycle progression from metaphase, but not from anaphase to the G1 phase in mammalian cells. *FEBS Lett* **406**, 267-70.

**Kas, E. and Laemmli, U. K.** (1992). In vivo topoisomerase II cleavage of the *Drosophila* histone and satellite III repeats: DNA sequence and structural characteristics. *Embo J* **11**, 705-16.

**Klein, F., Laroche, T., Cardenas, M. E., Hofmann, J. F., Schweizer, D. and Gasser, S. M.** (1992). Localization of RAP1 and topoisomerase II in nuclei and meiotic chromosomes of yeast. *J Cell Biol* **117**, 935-48.

**Laemmli, U. K.** (1970). Cleavage of structural proteins during the assembly of the head of bacteriophage T4. *Nature* **227**, 680-685.

**Lenz-Bohme, B., Wismar, J., Fuchs, S., Reifegerste, R., Buchner, E., Betz, H. and Schmitt, B.** (1997). Insertional mutation of the *Drosophila* nuclear lamin Dm0 gene results in defective nuclear envelopes, clustering of nuclear pore complexes, and accumulation of annulate lamellae. *Journal of Cell Biology* **137**, 1001-16.

**Lindquist, S.** (1986). The heat-shock response. *Annu Rev Biochem* **55**, 1151-91.

**McConnell, M., Whalen, A. M., Smith, D. E. and Fisher, P. A.** (1987). Heat shock induced changes in the structural stability of proteinaceous karyoskeletal elements *in vitro* and morphologic effects *in situ*. *Journal of Cell Biology* **105**, 1087-1098.

**McGadey, J.** (1970). A tetrazolium method for non-specific alkaline phosphatase. *Histochemie* **23**, 180-184.

**McKeon, F. D., Kirschner, M. W. and Caput, D.** (1986). Primary and secondary structural homologies between the major nuclear envelope and cytoplasmic intermediate filament proteins. *Nature (London)* **319**, 463-468.

**Meller, V., Fisher, P. A. and Berrios, M.** (1995). Intranuclear distribution of *Drosophila* topoisomerase II and chromatin. *Chromosome Res.* **3**, 255-260.

**Meller, V. H. and Fisher, P. A.** (1995). Nuclear distribution of *Drosophila* DNA topoisomerase II is sensitive to both RNase and DNase. *Journal of Cell Science* **108**, 1651-1657.

**Meller, V. H., McConnell, M. and Fisher, P. A.** (1994). An RNase-sensitive particle containing *Drosophila melanogaster* DNA topoisomerase II. *Journal of Cell Biology* **126**, 1331-1340.

**Moens, P. B. and Earnshaw, W. C.** (1989). Anti-topoisomerase II recognizes meiotic chromosome cores. *Chromosoma* **98**, 317-22.

**Ospina, J. K. and Matera, A. G.** (2002). Proteomics: the nucleolus weighs in. *Curr Biol* **12**, R29-31.

**Pederson, T.** (2000). Half a century of "the nuclear matrix". *Mol Biol Cell* **11**, 799-805.

**Pederson, T.** (2002). Proteomics of the nucleolus: more proteins, more

functions? *Trends Biochem Sci* **27**, 111-2.

**Rattner, J. B., Hendzel, M. J., Furbee, C. S., Muller, M. T. and Bazett-Jones, D. P.** (1996). Topoisomerase II alpha is associated with the mammalian centromere in a cell cycle- and species-specific manner and is required for proper centromere/kinetochore structure. *J Cell Biol* **134**, 1097-107.

**Roca, J., Berger, J. M., Harrison, S. C. and Wang, J. C.** (1996). DNA transport by a type II topoisomerase: direct evidence for a two-gate mechanism. *Proceedings of the National Academy of Sciences of the United States of America* **93**, 4057-62.

**Roca, J. and Wang, J. C.** (1994). DNA transport by a type II DNA topoisomerase: evidence in favor of a two-gate mechanism. *Cell* **77**, 609-16.

**Rose, D. and Holm, C.** (1993). Meiosis-specific arrest revealed in DNA topoisomerase II mutants. *Molecular & Cellular Biology* **13**, 3445-55.

**Rose, D., Thomas, W. and Holm, C.** (1990). Segregation of recombined chromosomes in meiosis I requires DNA topoisomerase II. *Cell* **60**, 1009-17.

**Rout, M. P., Aitchison, J. D., Suprpto, A., Hjertaas, K., Zhao, Y. and Chait, B. T.** (2000). The yeast nuclear pore complex: composition, architecture, and transport mechanism. *J Cell Biol* **148**, 635-51.

**Rzepecki, R., Bogachev, S. S., Kokoza, E., Stuurman, N. and Fisher, P. A.** (1998). *In vivo* association of lamins with nucleic acids in *Drosophila melanogaster*. *Journal of Cell Science* **111**, 121-129.

**Rzepecki, R. and Fisher, P. A.** (2000). During both interphase and mitosis, DNA topoisomerase II interacts with DNA as well as RNA through the protein's C-terminal domain. *J Cell Sci* **113**, 1635-47.

**Schuldt, A.** (2002). Proteomics of the nucleolus. *Nat Cell Biol* **4**, E35.

**Shamu, C. E. and Murray, A. W.** (1992). Sister chromatid separation in frog egg extracts requires DNA topoisomerase II activity during anaphase. *J Cell Biol* **117**, 921-34.

**Smith, D. E. and Fisher, P. A.** (1984). Identification developmental regulation and response to heat shock of two antigenically related forms of a major nuclear envelope protein in *Drosophila* embryos. Application of an improved method for affinity purification of antibodies. *Journal of Cell Biology* **99**, 20-28.

**Smith, D. E. and Fisher, P. A.** (1989). Interconversion of *Drosophila* nuclear lamin isoforms during oogenesis, early embryogenesis, and upon entry of cultured cells into mitosis. *Journal of Cell Biology* **108**, 255-265.

**Smith, D. E., Gruenbaum, Y., Berrios, M. and Fisher, P. A.** (1987). Biosynthesis and interconversion of *Drosophila* nuclear lamin isoforms during normal growth and in response to heat shock. *Journal of Cell Biology* **105**, 771-790.

**Stuurman, N., Heins, S. and Aebi, U.** (1998). Nuclear lamins: their structure, assembly, and interactions. *J Struct Biol* **122**, 42-66.

**Uemura, T., Ohkura, H., Adachi, H., Morino, K., Shiozaki, K. and Yanagida, M.** (1987). DNA topoisomerase II is required for condensation and separation of mitotic chromosomes in *S. pombe*. *Cell* **50**, 917-925.

**Wang, J. C.** (1996). DNA topoisomerases. *Annu Rev Biochem* **65**, 635-92.



**Watt, P. M. and Hickson, I. D.** (1994). Structure and function of type II DNA topoisomerases. *Biochemical Journal* **303**, 681-95.

**Whalen, A. M., McConnell, M. and Fisher, P. A.** (1991). Developmental regulation of *Drosophila* DNA topoisomerase II. *J. Cell. Biol.* **112**, 203-213.

**Wilson, K. L., Zastrow, M. S. and Lee, K. K.** (2001). Lamins and disease: insights into nuclear infrastructure. *Cell* **104**, 647-50.

**Wood, E. R. and Earnshaw, W. C.** (1990). Mitotic chromatin condensation in vitro using somatic cell extracts and nuclei with variable levels of endogenous topoisomerase II. *J Cell Biol* **111**, 2839-50.

**Dechat, T. et al.** (2010) 'Nuclear lamins.', *Cold Spring Harbor perspectives in biology*, 2(11), pp. 1–22. doi: 10.1101/cshperspect.a000547.

**Donnalaja, F. et al.** (2020) 'Lamin A/C Mechanotransduction in Laminopathies', *Cells*, 9(5). doi: 10.3390/cells9051306.

**Gasser, S. M. and Laemmli, U. K.** (1987) 'Improved methods for the isolation of individual and clustered mitotic chromosomes', *Experimental Cell Research*, 173(1), pp. 85–98. doi: 10.1016/0014-4827(87)90334-X.

**Girard, F. et al.** (1998) 'In vivo analysis of scaffold-associated regions in *Drosophila*: A synthetic high-affinity SAR binding protein suppresses position effect variegation', *EMBO Journal*, 17(7), pp. 2079–2085. doi: 10.1093/emboj/17.7.2079.

**Iyer, S. R., Folker, E. S. and Lovering, R. M.** (2021) 'The Nucleoskeleton: Crossroad of Mechanotransduction in Skeletal Muscle', *Frontiers in Physiology*, 12(October), pp. 1–8. doi: 10.3389/fphys.2021.724010.

**Kas, E. et al.** (1993) 'A model for chromatin opening: Stimulation of topoisomerase II and restriction enzyme cleavage of chromatin by distamycin', *EMBO Journal*, 12(1), pp. 115–126. doi: 10.1002/j.1460-2075.1993.tb05637.x.

**Kopka, M. L. et al.** (1985) 'The molecular origin of DNA-drug specificity in netropsin and distamycin', *Proceedings of the National Academy of Sciences of the United States of America*, 82(5), pp. 1376–1380. doi: 10.1073/pnas.82.5.1376.

**Majumder, P. and Dasgupta, D.** (2011) 'Effect of DNA groove binder distamycin a upon chromatin structure', *PLoS ONE*, 6(10). doi: 10.1371/journal.pone.0026486.

**Osmanagic-Myers, S., Dechat, T. and Foisner, R.** (2015) 'Lamins at the crossroads of mechanosignaling', *Genes and Development*, 29(3), pp. 225–237. doi: 10.1101/gad.255968.114.

**Rzepecki, R. and Fisher, P. A.** (2002) 'In vivo phosphorylation of *Drosophila melanogaster* nuclear lamins during both interphase and mitosis', *Cellular and Molecular Biology Letters*, 7(3), pp. 859–876.

**Rzepecki, R. and Fisher, P. a** (2000) 'During both interphase and mitosis, DNA topoisomerase II interacts with DNA as well as RNA through the protein's C-terminal domain.', *Journal of cell science*, 113, pp. 1635–1647. Available at: <http://jcs.biologists.org/content/113/9/1635.full.pdf>.

**Schneider, U. et al.** (1999) 'Phosphorylation of the major *Drosophila* lamin in vivo: Site

identification during both M-phase (Meiosis) and interphase by electrospray ionization tandem mass spectrometry', *Biochemistry*, 38(14), pp. 4620–4632. doi: 10.1021/bi9827060.

**Stuurman, N., Maus, N. and Fisher, P. A.** (1995) 'Interphase phosphorylation of the Drosophila nuclear lamin: Site-mapping using a monoclonal antibody', *Journal of Cell Science*, 108(9), pp. 3137–3144. doi: 10.1242/jcs.108.9.3137.

**Wagner, N. et al.** (2004) 'The lamin B receptor of Drosophila melanogaster', *Journal of Cell Science*, 117(10), pp. 2015–2028. doi: 10.1242/jcs.01052.

**Zaremba-Czogalla, M., Dubińska-Magiera, M. and Rzepecki, R.** (2011) *Laminopathies: The molecular background of the disease and the prospects for its treatment*, *Cellular and Molecular Biology Letters*. doi: 10.2478/s11658-010-0038-9.

## FIGURE LEGENDS

### Figure 1

#### **The expression of heat-inducible Hsp70 protein is an excellent indicator of the efficiency of stress and recovery**

The efficiency of heat shock induction and recovery was examined by immunofluorescence staining of Kc (A) and S2 (B) cells in different conditions: N - normal, HS - heat shock (1h) and R - recovery. Graphs A and B show merge, chromatin (DAPI - blue), lamin Dm (Lam Dm - grey), topoisomerase II (Top2 - green) and heat shock induction (Hsp70 - red) visualization. Scale bars = 5  $\mu$ m. Magnification x63. To confirm the effect of recovery western blot analysis was performed (C) similarly on both cell lines. Besides Hsp70, Hsf was used as a stress indicator,  $\alpha$ - tubulin ( $\alpha$ -Tub) was used as a loading control. Protein levels were verified at various time points after 1h HS and recovery after 6/24/48/72/96h (right away after HS), N conditions were used as a reference for complete R. Additionally, the relative expression (D) of selected transcripts (Hsf, Hsp22, Hsp68, Hsp70, Hsp83) in Kc cells was examined by RT-qPCR during different HS time points (15-, 30- and 60-minutes).

### Figure 2

#### **The effect of stress on gene and protein expression**

Graphs A and B show relative expression for specific genes of interest in Kc and S2 cells. Bars represent the fold change of the transcript level after 1h heat shock induction for Kc (black) and S2 (grey). The error bars represent the standard deviation from the mean of fold change, of 3 biological replicates, calculated by Applied Biosystems™ qPCR analysis module, connected with QuantStudio™ 5 thermocycler. For the final results calculations, the  $\Delta\Delta$ Ct method with the normalization on control cells (N) and the set of endogenous controls (18S/28S/Tub84B/Act5C) was used. Plot A shows genes of interest: Lam Dm, Lam C\*, Top2, and Hsf for both cell types. Panel B shows relative expression of Hsp representatives (Hsp83, Hsp22, Hsp68, Hsp70).

Total protein level (Top2, Lam Dm, Hsf, HDAC1, Hsp70,  $\alpha$ -Tub and ADL84) in N, HS and R (72h and 48h dependent on cell type) condition was examined on Kc (C) and S2 cells (D). The statistical analysis from densitometry signal only for significant changes after HS (presented on the right from WB panels on C and D graphs). The last lane marked as N48h/72h represents data from secondary control - cells cultivated the same duration of time as cells during recovery – R but without HS induction. For the statistical analysis of densitometric measurements,  $\alpha$ -Tubulin was used as a normalization factor.

\*Please note that Lam C transcripts were also detected in S2 cells (about 31st cycle), ~ 7 qPCR cycles after detection in Kc cells. In S2 cells the level of protein was undetectable.

### **Figure 3** **Stress affects the phosphorylation of lamin Dm Ser25**

Changes in the patterns of lamin Dm phosphorylation between N and HS conditions were examined by immunofluorescence staining of Kc cells (A). ADL84 visualization (Lam Dm S25) reveals decreased IF signal after HS. Graphs showing chromatin (DAPI - blue), lamin Dm (Lam Dm - green), dephosphorylation of lamin Dm on Ser25 (antibodies ADL84 specific for Lam Dm S25) and merge visualization. Scale bars = 5  $\mu$ m. Magnification x63.

The effect was confirmed by western blot analysis of total lamin Dm and unphosphorylated Ser25 variant performed on Kc (B) and S2 (C) cell lines. Staining for ADL84 shows the reversible decrease of lamin unphosphorylated on Ser25 after 1h HS, while a total pool of lamin Dm (both Dm1 and Dm2) is stable in response to HS. Relative band intensity quantification of total and unphosphorylated Lam Dm based on densitometric analysis of western blots was also performed (lower graphs on panels B and C). The presented data consists of 3 biological replicates (each at least 2 technical replicates). The statistical analysis was performed (t-student test) to investigate the differences in phosphorylation status after heat shock induction. Comparing N to HS the decrease of signal from Lam Dm S25 has been observed (B - Kc cells:  $p < 0,0001$  and C – S2 cells:  $p < 0,015$ ) while maintaining the same signal intensity from Lam Dm total. For the statistical analysis of densitometric measurements,  $\alpha$ -tubulin was used as a normalization factor.

### **Figure 4** **Stress reversibly relocates lamin and Top2 and other interacting proteins**

Immunofluorescence staining of Kc cells (A and C) and *D. melanogaster* embryos (B) shows stress-induced relocalization of Lam Dm and Top2 reversible upon recovery. Distribution of Top2, Lam Dm (A and B), and LamC (C and D) was analyzed in N, HS and R conditions. IF graphs A-E (depending on the staining variant) show chromatin (DAPI - blue), Top2 (green), lamin Dm (Lam Dm – grey/ red), lamin C (grey/red), heat shock induction (Hsp70 - red) and merge visualization. Scale bars = 5  $\mu$ m. Additionally, graphs B and D show fluorescence intensity analysis. Top2 rearrangement (E) and chromatin rearrangement (G) after heat shock were presented in the graphs as normalized values (the number of counted cell nuclei marked on the graphs as n). Top2 rearrangement (E) statistics (chi-squared test;  $p = 1,9 \cdot 10^{-27}$ ) was calculated based on the cell nuclei counted in *D. melanogaster* embryonic cells; chromatin rearrangement (G) was calculated based on cell nuclei counted in 3rd instar larvae cells (chi-squared test;  $p = 6,62 \cdot 10^{-8}$ ). Representative staining is shown on the F graph for Top2 rearrangement and on H for chromatin rearrangement.

## Figure 5

### Stress affects the solubility of lamin Dm and other nuclear proteins in Kc and S2 cells

A solubility assay verified by western blot analysis showed differences between the solubility levels of proteins (Lam, Top2, HDAC1, Hsf, Hsp70) in N and HS (1h) conditions in Kc (A) and S2 cells (B). Data on bar graphs (C – Kc cells and D – S2 cells) were plotted as the percentage of output lysate which was considered as 100% for each replicate. The statistics (t-student test) on the bar graphs show the comparison of N versus HS conditions for each fraction independently. Above each plot, the number of repetitions (n) taken for the statistical analysis is given. White bars in each graph refer to normal conditions (N - 23°C), grey to heat shock induction (HS – 1h, 37°C). Subsequent fractions are marked as lysate (control), 50 mM, 150 mM and 500 mM respectively. No significant difference is pointed as “ns”, significant as “\*” (p-value < 0,05), “\*\*” means very significant (p-value < 0,01), “\*\*\*” - extremely significant (p-value < 0,001), and “\*\*\*\*” (p < 0,0001).

## Figure 6

### Lamin Dm interacts with Topoisomerase II directly through adjacent chromatin DNA regions and interactions are increased during heat shock

Immunofluorescence staining of cell nuclei from *D. melanogaster* larvae (A, B – bottom panel), C and J. Chromatin was visualized by DAPI staining (blue), Top2 (green), Lam Dm/ LamC (red). Two left and bottom right panels on graph 6A show staining of polytene nuclei (all channels were merged) for Lamin Dm (ADL677; ADL84.12 – phospho- specific), Lamin C (LC28) and Top2 (Rabbit AP IgG). Diploid nuclei (6A lower right panel) are shown separately for staining of Top2 (green) and Lamin Dm (red) and merged. Colocalization was confirmed by PLA assay (B, C, H and J) for Top2 and Lam Dm. Graph B shows colocalization confirmed in the Kc cell line (6B bottom) and polytenic nuclei of salivary gland cells from 3rd instar larvae (6B below) with appropriate controls - without antibodies (left) and only with anti-Top2 antibodies (middle). A positive signal was observed only after incubation with both antibodies (Lam Dm and Top2 – right panels). In the supplementary material for this figure videos showing the interaction between the tested proteins have been posted presenting polytene chromosomes cell nuclei. Graph C shows a simple Z-series of those movies. LamDm and Top2 localize in common protein complexes in 3rd instar larvae diploid and polyploid nuclei from proximity ligation assay performed on larval spreads (J). Next, the co-immunoprecipitation analysis anti lamDm and Top2 were performed (D-G). First, the interaction was confirmed with specific RαLam Dm antibodies (used during the IP procedure, while WB staining of lamin Dm was performed with MαADL67 antibodies) with the increasing amount of embryo extracts (D).

Direct interaction was confirmed by the WB analysis co-immunoprecipitation performed with affinity-purified anti-lamin Dm (E left) or Top2 (E right) antibodies on native Kc cell extracts. After IP additional S1 micrococcal nuclease treatment was performed a positive signal was observed in the treated and untreated samples confirming a direct

effect. Also, during IP (anti Lam Dm and anti Top2) in cross-linking conditions (1% PFA) in Kc cell line Lam Dm and Top2 co-immunoprecipitated (F) in both N and HS conditions. co-IP as well as WB staining was performed with R $\alpha$ LamDm and R $\alpha$ Top2 specific antibodies (n=3). Zoom to the path of lamin Dm with separated Dm1 and Dm2 lines indicated (G) shows lamin Dm conversion after heat shock induction. The increased signal from the interaction of Lam Dm and Top2 was observed after HS after PLA assay was performed in the Kc cell line (H). Statistical analysis of Kc PLA assay (I) showed statistical significance, quantification of PLA performed on Kc cell culture, approximately 100 nuclei were counted for each condition, ANOVA test applied,  $p < 0,01$ .

## **Figure 7**

### **Stress induces the association of lamin Dm and Topoisomerase II with chromatin DNA**

Graph A shows a western blot (WB) and autoradiography (32P) analysis of immunoprecipitation performed with affinity-purified anti-lamin Dm antibodies on native Kc cell extracts. After IP additional micrococcal nuclease treatment was performed. Graph B shows WB analysis of immunoprecipitation performed with affinity-purified anti-Lam) or anti-Top2 on UV cross-linked Kc cell extracts. After IP additional micrococcal nuclease treatment was performed. In both cases membranes after WB were stained with affinity-purified polyclonal anti-Drosophila lamin Dm-derivatives antibodies (Lam) and affinity-purified polyclonal anti-Drosophila Top2 antibodies (Top2) confirming interactions regardless of the conditions used in the experiments.

The effects of DNase I and RNase A on labelled nucleic acid associated with both lamin Dm and Top2, in normal cell nuclei (N) as well as after heat shock (HS, 1h) was analyzed on panel C. Western blot analysis (WB) and 32P-labeling (32P) are as indicated. Kc cells were grown according to Materials and Methods and as indicated, harvested, subjected to standard UV photo-crosslinking, lysed and subjected to further manipulations including immunoprecipitation and 32P-labeling all as described in the Materials and Methods section. Nuclease treatments after 32P-labeling are indicated below each lane.

Graph D shows WB and 32P analysis of fractionation of 32P labelled and UV cross-linked Kc cell lysate. Untreated lysate (total), soluble and insoluble fractions are shown. Fractionation of protein-bound nucleic acid, NaCl extract (soluble) versus insoluble ('matrix') fraction. WB analysis and 32 P-labeling are as indicated. Kc cells were grown, harvested, subjected to standard UV photocrosslinking, lysed and subjected to further manipulations including cell fractionation, immunoprecipitation and 32 P-labeling all as described in (Rzepecki et al., 1998; Rzepecki and Fisher, 2000). Fractions loaded after 32 P-labeling are indicated below each lane.

Graph E shows WB and 32P analysis of insoluble fractions of 32P labelled and UV cross-linked Kc cell lysate in normal (N), heat shock (HS) and recovery (Rec) conditions.

Graph F shows WB and 32P analysis of fractions of 32P labelled and UV cross-linked Kc cell lysate in N and HS conditions with (+) and without (-) distamycin treatment.

Graph G shows WB analysis of Hsp70 level in Kc cells after different treatment conditions (indicated on the panel).

## **SUPPLEMENTARY DATA**

Figure 1 – Figure Supplement 1

### **Heat shock induction in *D. melanogaster* embryos**

The efficiency of heat shock induction and recovery was examined by immunofluorescence staining of *D. melanogaster* embryos in different conditions: Normal, Heat shock (1h) and Recovery. Merge, chromatin (DAPI - blue), lamin Dm (Lam Dm - red), and heat shock induction (Hsp70 - green) visualization.

Figure 2 – Figure Supplement 1

### **Assessment of the gene stability after heat shock induction on *Drosophila melanogaster* cells (Kc and S2) after 1h of HS.**

Gene expression for all tested genes (names given on the x-axis) for Kc and S2 cells (A). Bars representing fold change of the transcript level after 1h heat shock induction for Kc (black) and S2 (grey). Only normalization on control (N) was used without further normalization on housekeeping genes. The threshold marked by a dotted line was set as 2 fold. Determination of the most stable reference (housekeeping) genes from a set of tested candidate reference genes was performed using the geNorm algorithm (B). Average expression stability was measured to choose the common endogenous control for Kc and S2 cell lines in heat shock.

Figure 2 – Figure Supplement 1

### **List of the primers used for RT-qPCR analysis**

Table with a list of all primers used in RT-qPCR analyses. Their sequences, efficiency and source.

Figure 4 – Figure Supplement 1

### **Analysis of redistribution of other nuclear proteins in Kc cells.**

Immunofluorescence staining of Kc cells in N, HS (1h) and R condition. Distribution of Hp1 (A – red), Hsf (B - green), HDAC1 (C - green), LBR (D - green) and Pol2Ps5 (E - green). On each graph, chromatin was stained using DAPI (blue). Additionally, Top2 (A - green), Hsp90 (B – red), Lam Dm (C, D and E - red) and bocksbeutel (E- grey) were visualized. No significant re-distribution was observed in the examined conditions. Scale bars = 5 µm.

#### Figure 4 – Figure Supplement 2

##### **Analysis of redistribution of other nuclear proteins in *D. melanogaster* embryos.**

Immunofluorescence staining of *D. melanogaster* embryos in N, HS (1h) and R condition with additional fluorescence intensity analysis (A-D). Distribution of Hp1 (A – red), Pol2PS5 (B - green), Hsf (C - green) and HDAC1 (D – green). On each graph, chromatin was stained using DAPI (blue). Additionally Lam Dm (A – green, B-D - red) was visualized. The area from which the fluorescence intensity was analyzed was marked with a yellow line in the “Profile” column on each graph. A graph of the fluorescence intensity distribution (Signal intensity) for each channel is also presented (for each staining separately in the corresponding colour). No significant re-distribution was observed in the examined conditions. Scale bars = 5  $\mu$ m.

#### Figure 5 – Figure Supplement 1

##### **Solubility assay – a different approach to analysis - validation for the mean intensity of the WB membrane signal**

The graphs show the same experiment as in Figure 5 with a modified data presentation method. Data was validated for the mean intensity of each band from a given membrane. A solubility assay verified by western blot analysis showed differences between the solubility of proteins (Lam, Top2, HDAC1, Hsf, Hsp70) in N and HS (1h) conditions in Kc (A) and S2 cells (B). White bars in each graph refer to normal conditions (N - 23°C), grey to heat shock induction (HS - 37°C). Subsequent fractions are marked as lysate (control), 50 mM, 150 mM and 500 mM respectively. No significant difference is pointed as “ns”, significant as “\*” (p-value < 0,05), “\*\*\*” means very significant (p-value < 0,01), “\*\*\*\*” - extremely significant (p-value < 0,001), and “\*\*\*\*\*” (p < 0,0001).

#### Figure 5 – Figure Supplement 2

##### **Stress affects the solubility of lamin Dm and other nuclear proteins in embryos**

The experiment was conducted in the same way as it was performed in the case of Kc and S2 cells. The solubility assay was verified by WB analysis (detected proteins: Hsp70, Lam Dm, Top2, HDAC1 and  $\alpha$ Tub). The figure shows both approaches to the presentation of the obtained data, which were discussed earlier (B- percentage of lysate and C- validation for mean intensity signal from each membrane). A statistically significant decrease in the lamin Dm solubility after HS in the 50 mM fraction and an increase in Top2 solubility in 150 mM does not reflect the data obtained from the cell culture.

#### Figure 6 – video 1

##### **PLA movies**

The polytenic nuclei of salivary gland cells of the third instar larvae using proximity ligation assay technique (PLA) using anti lamin Dm monoclonal ADL67 antibody and affinity purified anti Top2 antibodies.



Figure 6 – Figure Supplement 1

**Cross-linking co-immunoprecipitation performed on S2 cell lines against lam Dm and Top2**

During precipitation in cross-linking conditions of Lam Dm in S2 cells the topoisomerase II co-immunoprecipitated, and conversely. Cells were cross-linked with 1% PFA and then co-immunoprecipitated with antibodies against Lam Dm (A) or Top2 (B). Detection of interaction was performed by immunoblotting with the same antibodies. As a negative control, the same procedure was performed with isotypic antibodies (IgG). No statistical analysis has been carried out.

**Figure 1**

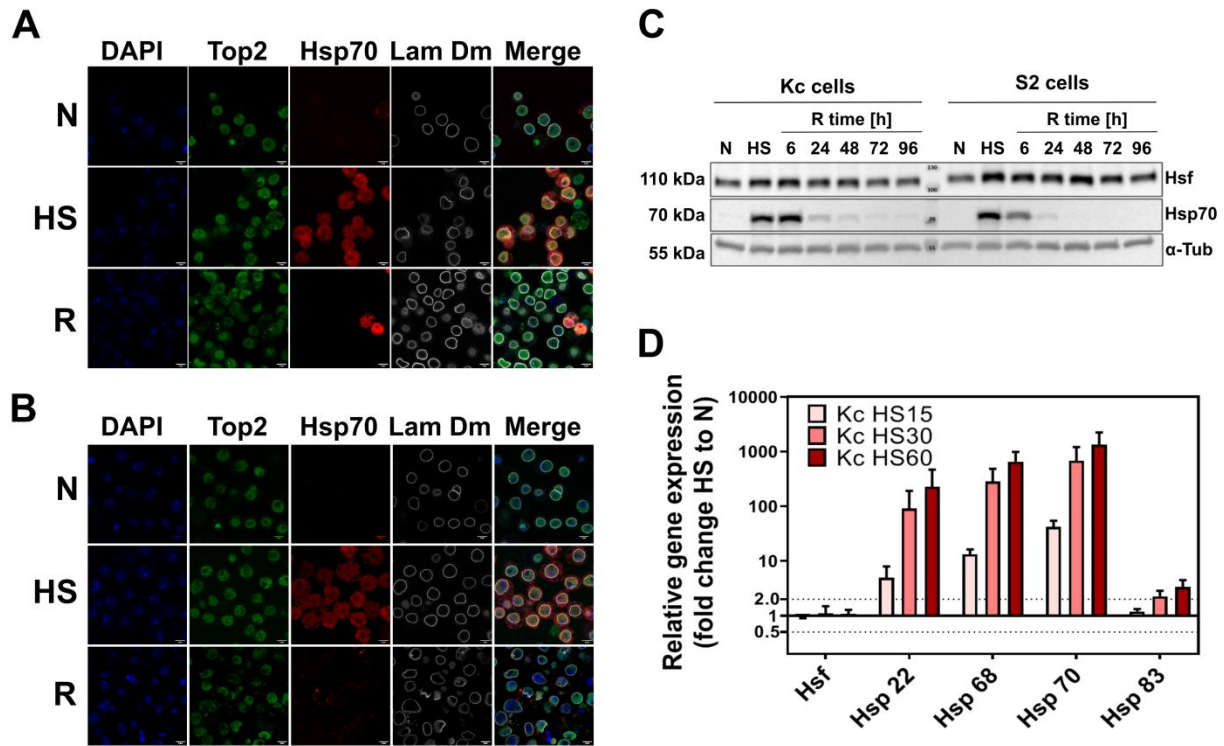

**Figure 2**

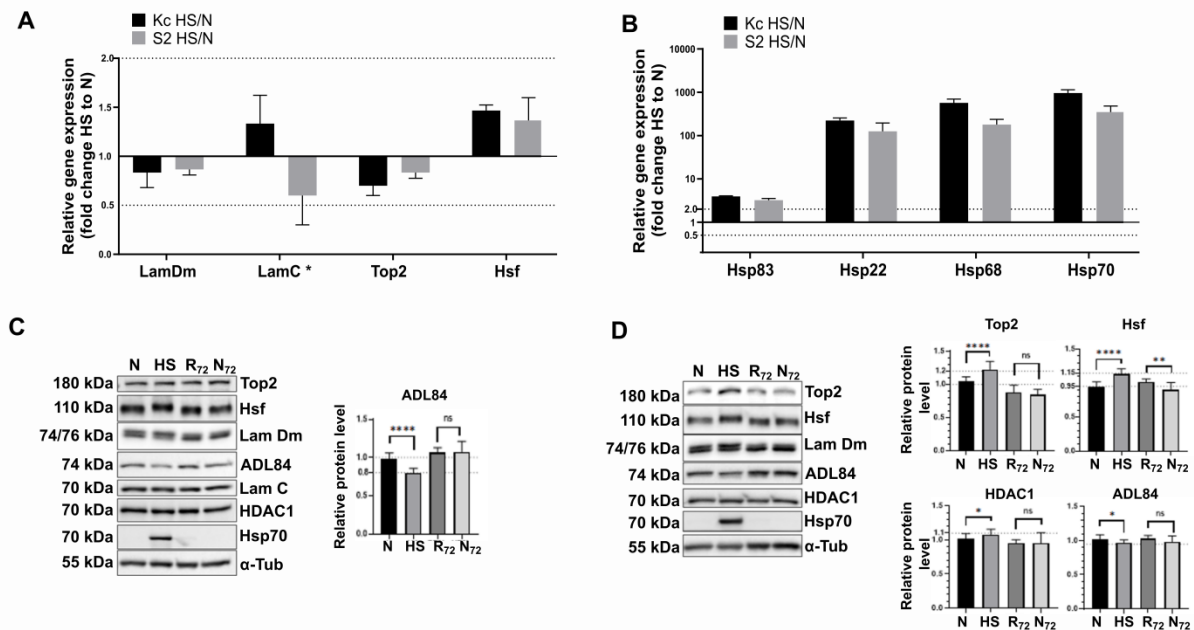

**Figure 3**

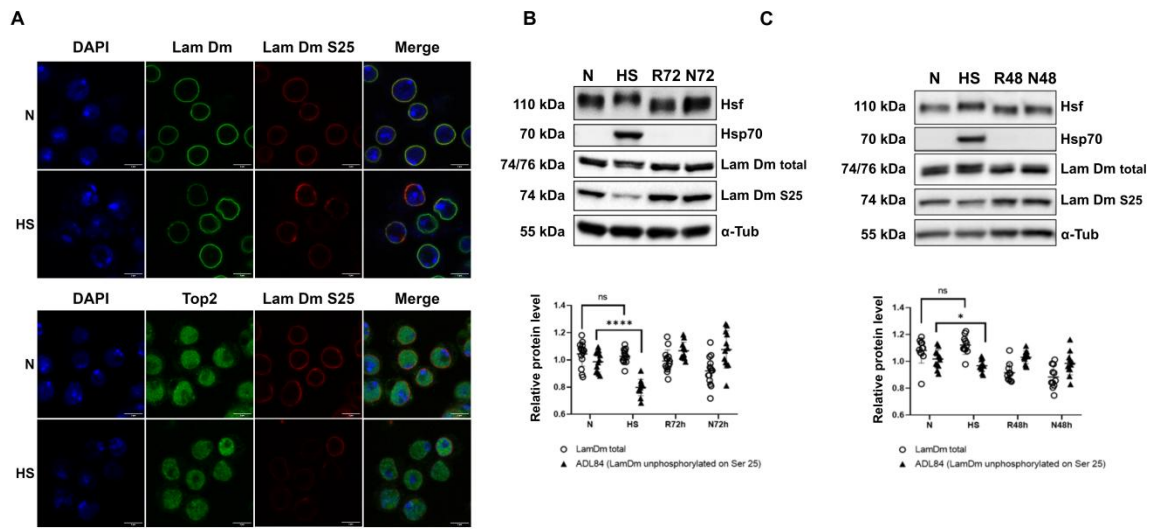

**Figure 4**

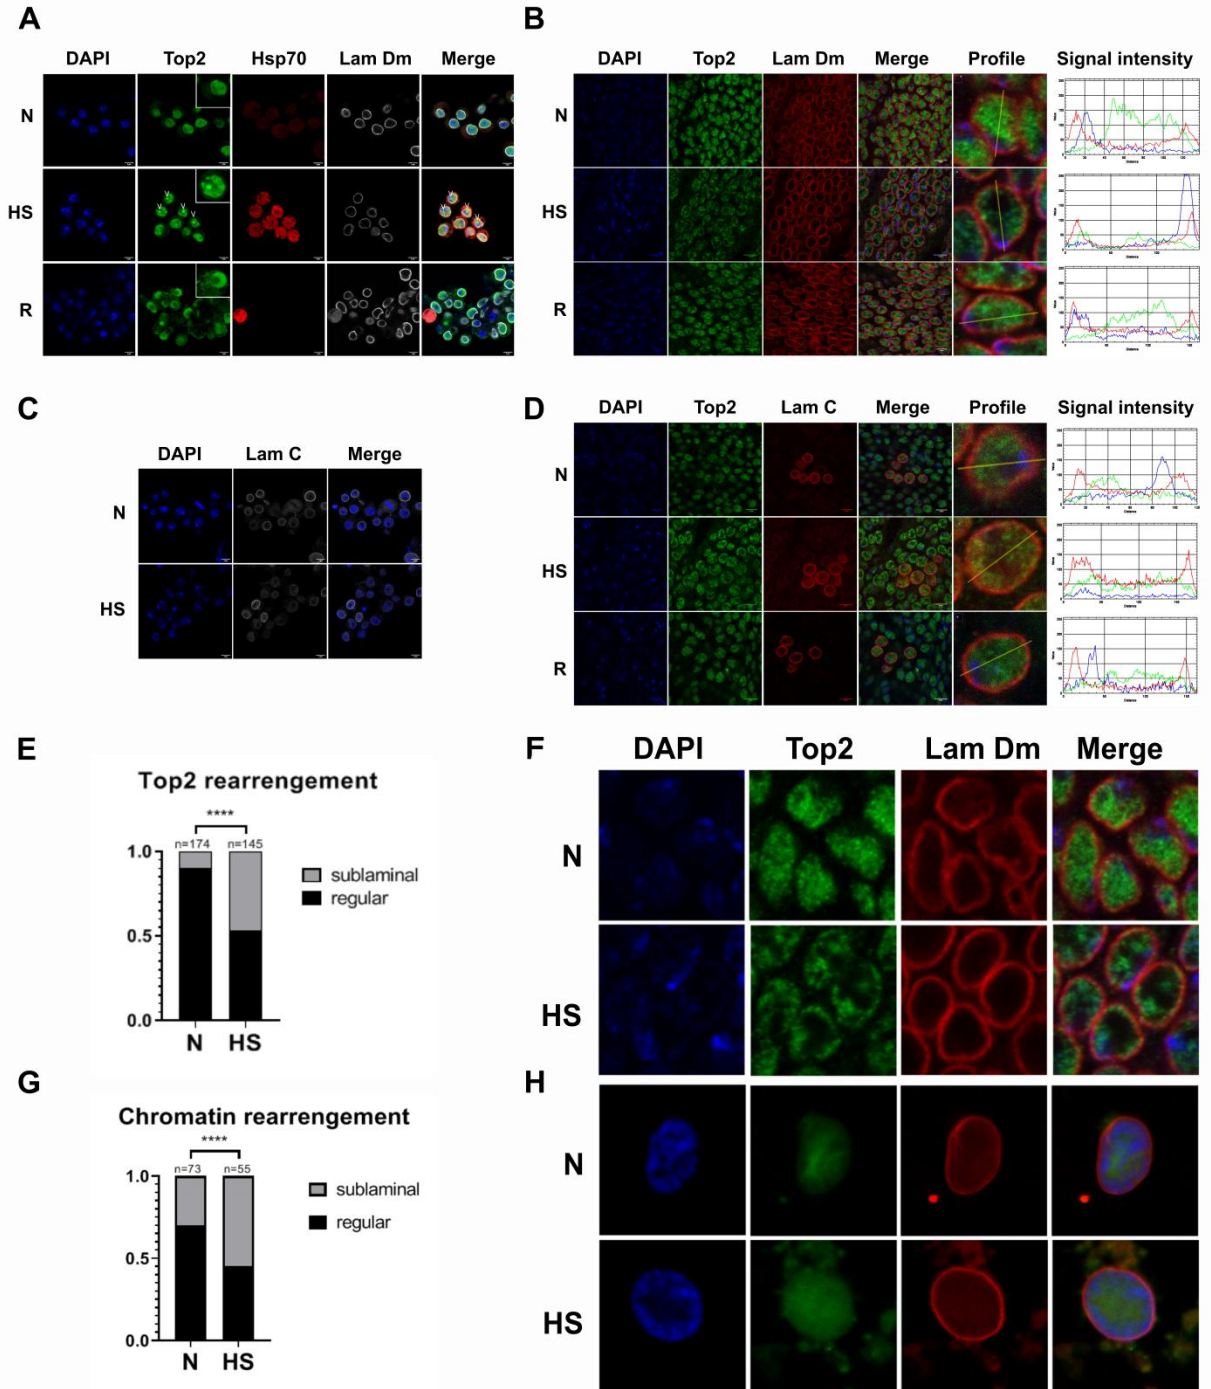

**Figure 5**

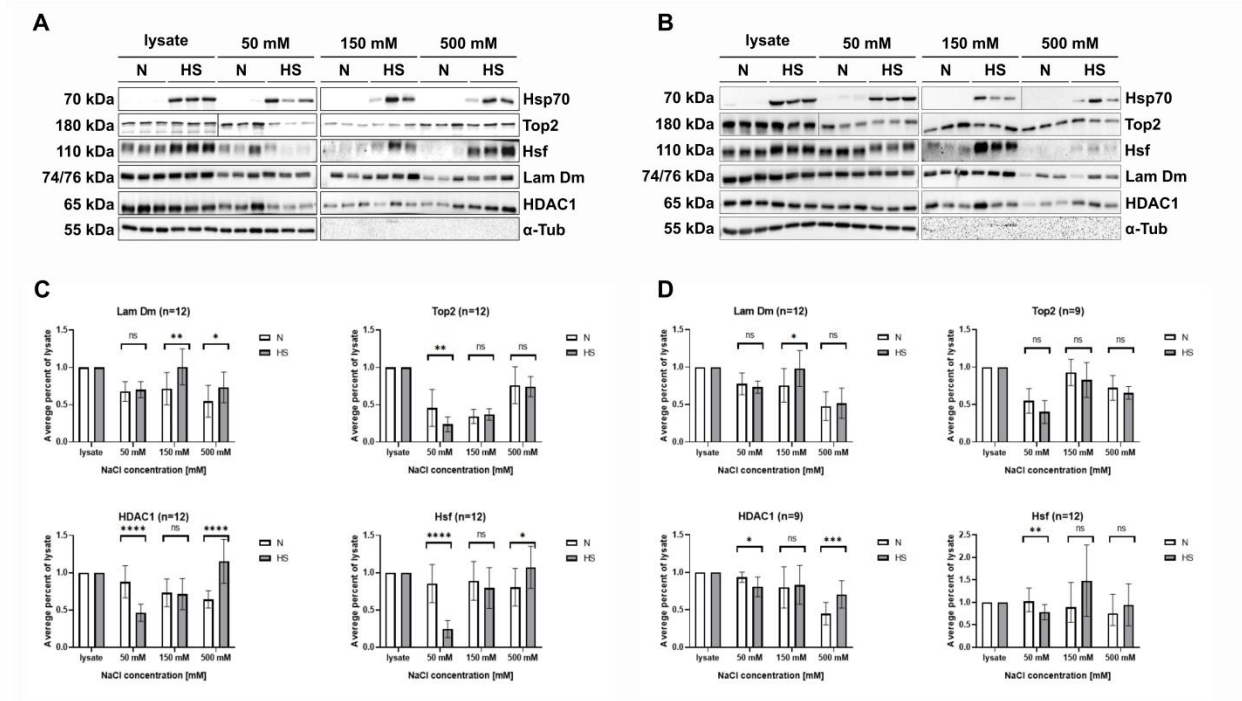

**Figure 6**

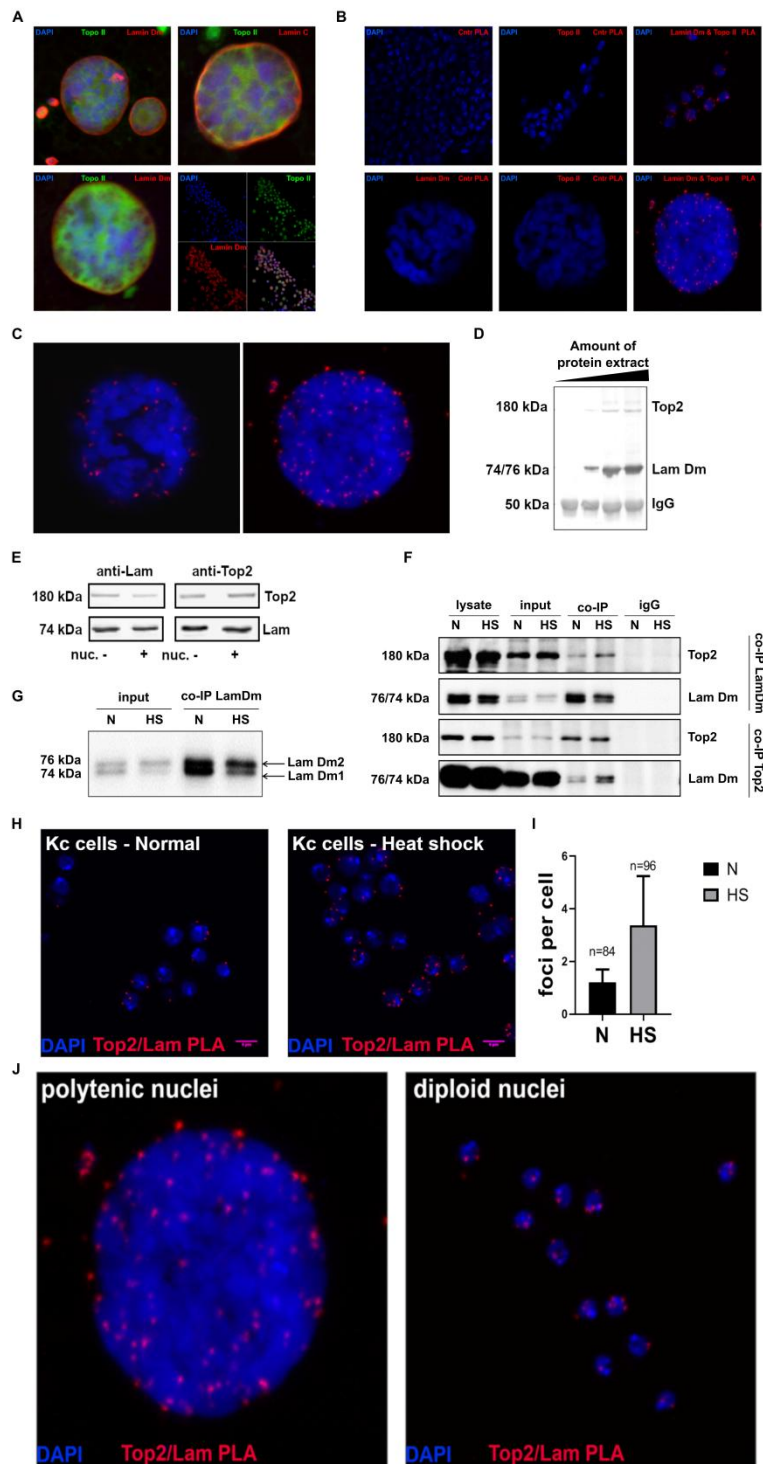

Source: https://www.biorxiv.org/content/10.1101/2024.02.28.582469v1.full.pdf
